# Supplementary material for: Identification and Expression Analysis of Odorant-Binding and Chemosensory Protein Genes in Virus Vector Nephotettix cincticeps
Source: MDPI journal article supplement (doi:10.3390/insects13111024), 2022-11-05
Supplement: s1 [file s1]

**Identification and expression analysis of odorant-binding and chemosensory protein genes in *Nephotettix cincticeps*, a main vector of rice dwarf virus in Asia**

Xuefei Chang<sup>1,2</sup>, Haipeng Chi<sup>1</sup>, Yaluan Bi<sup>2</sup>, Qi Fang<sup>2</sup>, Zhaozhi Lu<sup>1</sup>, Fang Wang<sup>2\*</sup>, Gongyin Ye<sup>2\*</sup>

<sup>1</sup>Shandong Engineering Research Center for Environment-Friendly Agricultural Pest Management, College of Plant Health and Medicine, Qingdao Agricultural University, Qingdao 266109, China

<sup>2</sup>State Key Laboratory of Rice Biology & Ministry of Agriculture and Rural Affairs Key Laboratory of Molecular Biology of Crop Diseases and Insects, Institute of Insect Sciences, Zhejiang University, Hangzhou 310058, China

**\*Correspondence:**

Fang Wang, wangf121@zju.edu.cn

Gongyin Ye, email: chu@zju.edu.cn.

Supporting Information

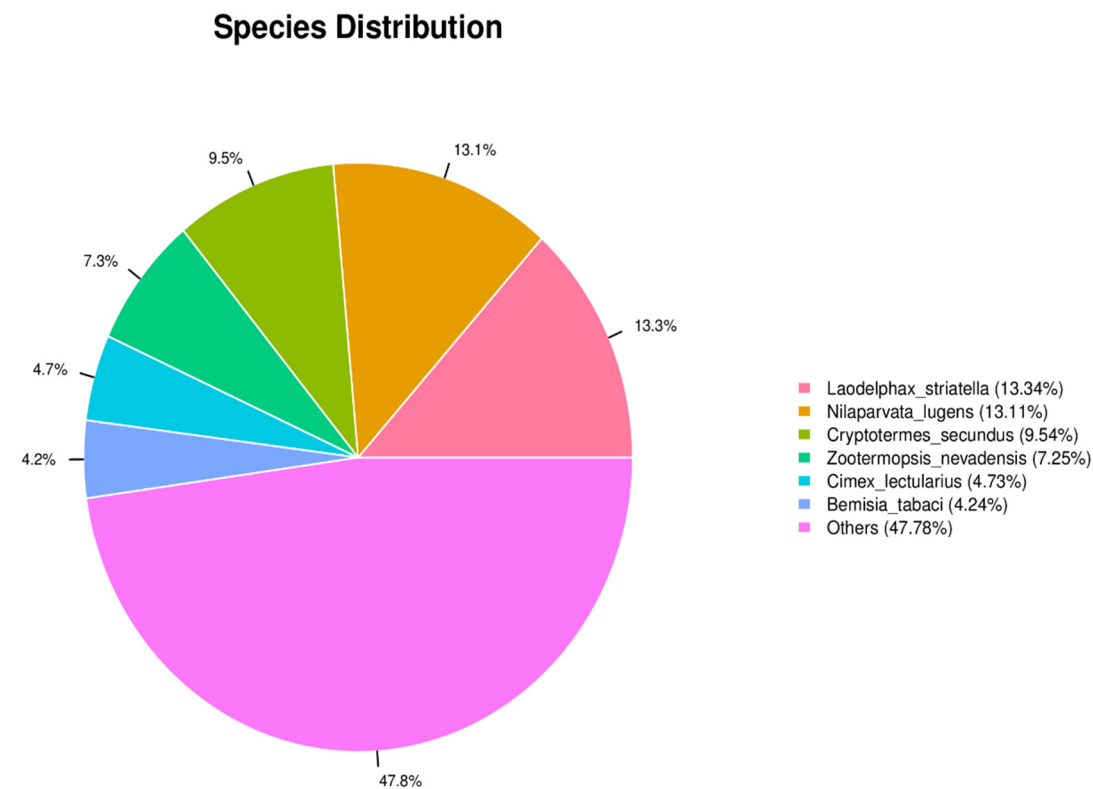

**Figure S1 Species distribution of top best hits of the BLASTx results.**

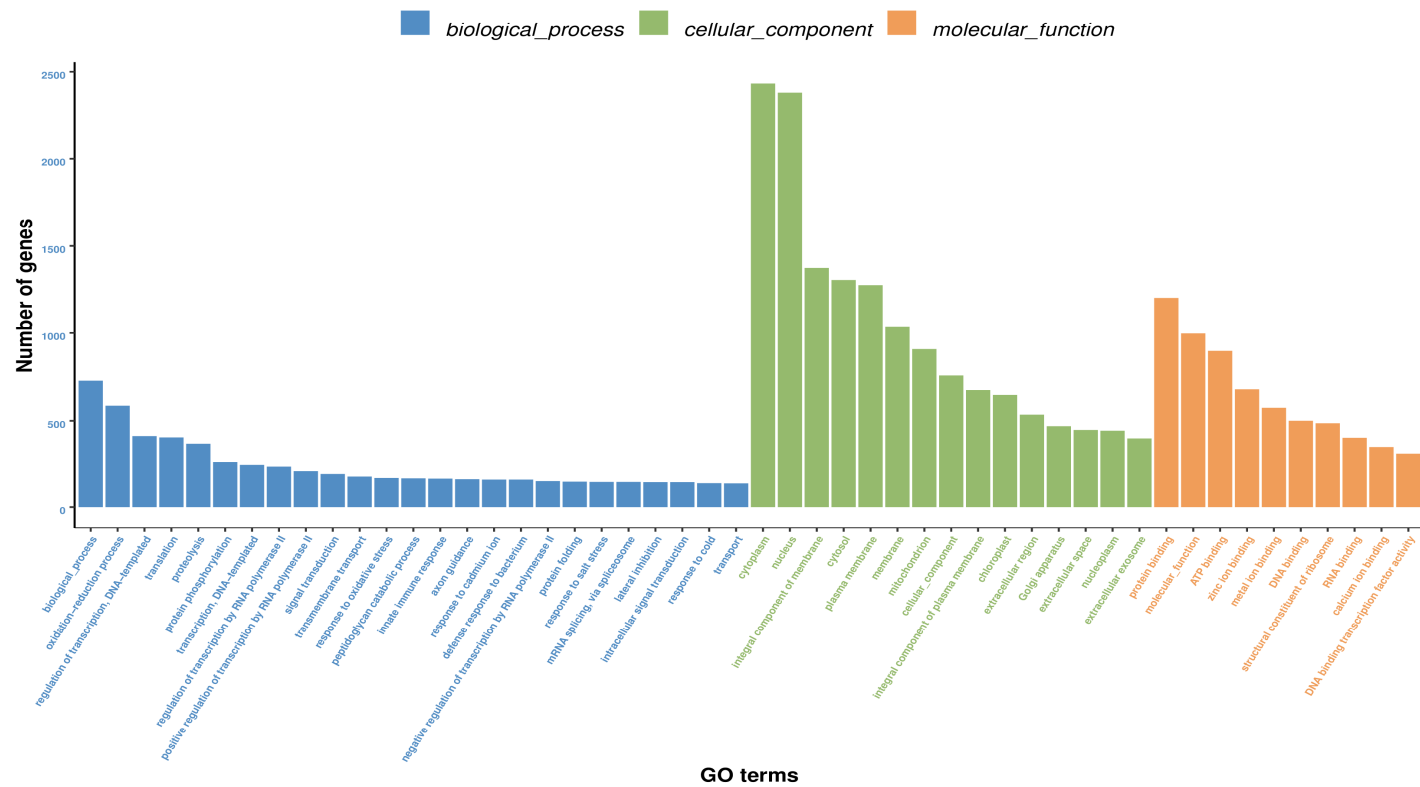

**Figure S2 Gene Ontology (GO) classification of the 46,623 unigenes of *N. cincticeps*.**

## KEGG Pathway Classification

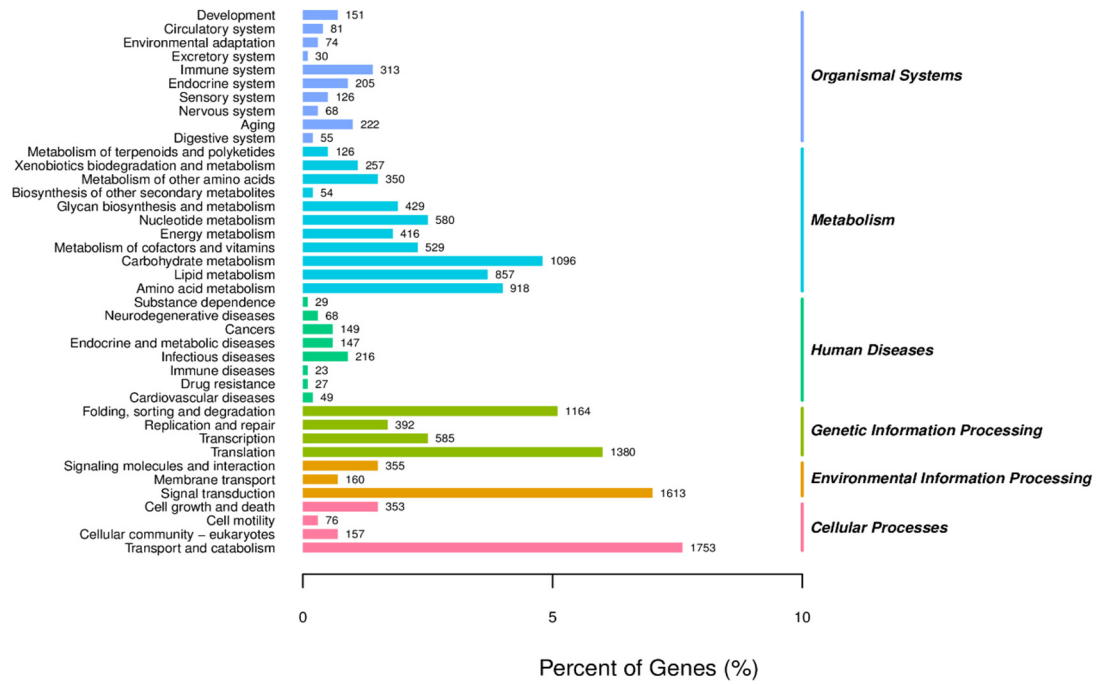

Figure S3 KEGG classification of the 46,623 unigenes *N. cincticeps*.
