# Supplementary material for: Identification and Expression Analysis of Odorant-Binding and Chemosensory Protein Genes in Virus Vector Nephotettix cincticeps
Source: Insects. 2022 Nov 5;13(11):1024. doi: 10.3390/insects13111024 (PMC9698027; doi:10.3390/insects13111024)
Supplement: Supplementary file 1 [file insects-13-01024-s001.zip]

Archive with 7 entries (7 files):
- Supporting Information.pdf
- Table S1 OBP sequences used to construct the phylogenetic tree.xlsx
- Table S2 CSP sequences used to construct the phylogenetic tree.xlsx
- Table S3 Primers used for qRT-PCR analysis of OBP and CSP genes of N. cincticeps.xlsx
- Table S4 Overall profile analysis of sequencing data.xlsx
- Table S5 The summary of distribution of assembled length in N. cincticeps transcriptome.xlsx
- Table S6 The number of unigenes annotated in different database.xlsx
