# Supplementary material for: Identification and Expression Analysis of Odorant-Binding and Chemosensory Protein Genes in Virus Vector Nephotettix cincticeps
Source: Insects. 2022 Nov 5;13(11):1024. doi: 10.3390/insects13111024 (PMC9698027; doi:10.3390/insects13111024)
Supplement: Supplementary file 1 [file insects-13-01024-s001.zip › Table S1 OBP sequences used to construct the phylogenetic tree.xlsx]

## Sheet: Table S1
Table S1 OBP sequences used to construct the phylogenetic tree
Species		Gene		Sequences
Nephotettix cincticeps		NcinOBP1		MKNQLFYLVAVFVLAQGKEENECDLKTKNKMEPSECCKSAADTELLKKEAIEKCVEKLPPPKKLLEQKKEQVSEDDPELKNYGACMTECLFLESGFVKDNTINRDATKKAFLAMNGNFTTMLSKKVDKCADLIENMDRSNLKCKSGAGEFSRCLSREWFLNCPDAYWNNDTACDELKLQVTKCPQLY
		NcinOBP2		SNLGSVSLSAHSFQFSMLSALALLLLVLHSSCAQVQQRLVSESELVDPPRRTLCVPPSTAPAQLEAVIEQCQEEIKQAVLEEALEVLGDAGQELDVNPQNHNRTRRETFTGEERRIAGCLLQCVYRKVKAVDEAGLPTIPGMVRLYSDGVSDRNYFQATVQAVHQCMSAAERRRALNPSSVQDGGYTCDLAYDMFTCVSDRIEAICGQAP
		NcinOBP3		GFLYTLTIATSALCFAFPLIQSRVHWDEAEKNWKKCSEETGAEENMDAVMRKEIMPTSDKGMCLIECLMRAESIYDQDGKFNKEGTRKHFDIIFEEQPQVIEEAMDIADDCSKIDIEGLNKCEAAMKHVTCAQVKFAQAKIVAIRD
		NcinOBP4		KQLSLVSGVFILQILVYFHGTLLAQQLNKKTFKKTFMEAATKCSREVGTPSAMSVTYLTRPENTDRNSKCFTHCLLNKFNMMNKQGKFDQNSIRTFLNGIPTSRFKDSLNRNLPACLQENDSDPCDKGYKFIQCFYRRGS
		NcinOBP5		MKSCLALVVILAAFVSVQAALNREKSIALAKKCAARTGAKENPEELLDKQLIPETREGKCMFACVLKEKGLMKNGKMDGRAVSEFFEKTYQDDPEKLEQAAAAVGKCSTLDVKGKDECEVAVAYAACGKKVRLNNNLQLIIINP
		NcinOBP6		MLIHLTRLIKTLKYNYFVVSPEVRLSEAGLVQVTRHSEVGLYIQARGQRLHTPHSTAMLPAASTISVLLMLLSGVLAYDFHDFHFNEILADQLEDLDLDHSMRVRRELSTDEDEAEKFLKCKHYHGKSCCGKGKRMKHFAPGMADATKKIYGECFEDFQQKLNATGVVTGGDPFSCDRVNQMKMKVICTSDCVAKKVDMINEDGSINKDKALSHMEKIEYEDWQKPIVVNAINKCAATANSTKASIPSIGDIECSAAMLTFQHCVFVESEKNCPEDQKKTEGKCKKVFDKYKASII
		NcinOBP7		MAHVYNWRLLDSPQSPTPARPTPATMSCRPILVVFCVVLALAQAKLDPEQVRKNFEACKTETGAPETYEEVIQQKKIPTSDKGMCLVECLLKKREIYDSEGKYNPEGTKKYFLSVFDDRKDEYEKSVAIAEECSKIDVEGLDKCEAAVKHLTCAKTKAVQQNIKVDAVH
		NcinOBP8		MLLVSASVFVVLVVICVKGEDDCMPPKPGEKHIHPPECCKLEGVSGIYPDAMKVAAGKCREKFPHPPHLPKPSGSPPPGPPPRSPEMKKYITCMAECVFTEVGVVKDGKLDKDAAMKSFKTDNKELTSTISAAIDKCFTTYEKDVDPSLECKSGAAEMEKCVMREIFLSCPSSMWNDSAECTALKTKIDKCPQMPVMLMGPPGPRSPRPH
		NcinOBP9		MATLSARCWTALLVGVAVAHVSEAAMSMQAFKQAKAMMEGVCQPKVGVNKEFLSQMRKGEFPDTDDRKLKCYFECILRMGNAMVGTKVSGEALRRIARTMVPKQLMSKVMPAIDSCENIDEGDACESAFTFVKCHYKASGPEVSLFLPD
		NcinOBP10		MDVHMTEDQKKMIAMLHGNCVKESSASEDNIQAASKGDFKDDDNLKCYMKCLLVQMGIFSEEDMSLDKEAMIEMVPEELKEVTANALTKCLPLHGENACDMAFNMNKCFYEFNPEVKN
		NcinOBP11		VWLVSLQHQGRGVIFIRQNFKTMYFQIILSVLVALCFSQVLSQDMGMNSTMVMSGGANSTMEGTPCRERMRNMTMKCAKETGATQDDVDAAMRMEIPSSETGKCLTKCLLKGRGMMTPEGAFSPNVTAEFLTMANKNETLRAEFKKLANYCYEKLKIQPMSSLDTCEFAHDIATCTEEYQRTLFLRNPAMAPPVNAITTP
		NcinOBP12		LCYFVALGVLSLVLGSRGDDCSPPKPGDKTPSPYQCCKKERKIPDVMKVNIPKCIDKAPLTGKSDPQEVRNAAICTAECVFEESNLLTPEGKVDLPTFKKIMAETYPEKKNSSANVDKCASTIGSRIDPTSECKSGALELQECLRRDCFLHCPKDLWTTSKECEELRKKVEQCPGYPLVDDMDHHH
		NcinOBP13		CTEPLVATMKCHNLDVSTVPYRKVEMQCLLILSVSLMSVVIADDDDCRPLPPFLKGERKVHPTVCCNLEPAMPDIIDVNLRLCLTRSMSHNQTTHEAQAKLDYKQNNLTMATNSRSERACLDECIFNESGLLTPDKQVNKEAVYRVFSGTAASSKDIAPVMTAALDKCFNVYKEMINKALKCTSGSEELRKCIIREMFLNCPAASWNSSAECMELKNKYSKCPNLQVAGKQIYTMA
		NcinOBP14		MNAVRSGMIVLAVVSTVVLTVAGQQQFDVQKMYRECQQQSNATDEELSAFQKSQSIPTTQHGKCLLACIFQNTGVMTSEGKYNADGVFNLAKQSYMKAPEKLDKARKVVDICAEQVKSAEDKCEVAVIVANCTMITSMKVRVETLRSQLKPFHTPS
		NcinOBP15		MDLLLVNLNSNSFVKKNCSQASRSSQRSAVAKCAKDAKTTPETFKDLLTTRKVPDTQLEKCFLGCLYKKIGLTRNGTLNYTRAKSIARNQYSNNKEKLQKALGILDKCKTIDALNDECLLGFKLRECVLVNSDDSF
		NcinOBP16		SLLLVVCVAVAFVAVRGALDRKQSIELAKKCAAKTGAKENPEELLDKQLIPTTREGKCMFACVLKEKGLMKNGKVDGKAVSDFFEKTYADDPEKLEEAASAVGKCSTTVDTKGKDECEVAVAYAACGKKEGFKLE
		NcinOBP17		MRKLSRSADQRTAGGCFSRGRRLQSPFTADTDMAVHNILVLAALFCVALGALPREKKLSFLKECEEKHKTGLNIEEILDKWLIPESKEGQCLMECFVLKKGLINDKAEIDHKTATPHFMESFPGDQESVDKAERALAECDKLDLSKLDHCTRAVEVLKCFRLNAKKLNLKH
		NcinOBP18		LVVLFIVSCGLNSARAGLERDKAIELMNECKEKTKAKEDVLDVIDKNKMPTSAEGKCMMHCVMESKGLMTGSKANTKAFADYFEKAYATEPAKLENAAKALAACSVQKNGWGSLDKCEIASRIFKCGADNHVSLS
		NcinOBP19		QGLVVLVGFALCAWTPMSQAAFPDKGLQENFGKCAQKQNLTNDDIEKLKRKENLSDERYKCLAKCVCEKEGLVKDGKYDKGAAKKMATKMYKDNATKLKKAEDVAEECNGKLKDVSTSGCEIGPAVLGCLIAGAKEKELIKQEKKIR
		NcinOBP20		MKYFLCVVLGCVYYAKGALWMSDVYELARRCNKLPEVNGSEEDVTELLMGYLPDSRSGRCMLKCMQEHVGILTNGSYDLKGAYLFFRTSFPENPHFKNMERAVRFCGKIVEQRRTVDMDPCHYAHMVASCIKRRIIYRPGCRAAFYNPFKWHNPSRRATVRPRKKYFVPDPKFMEKIQFEIITKPTRKYTLDDLEKRLSSRESVEPQAYVFVPPKLRKGKWGRRKKEEMKEKRKKEKEGDGSENSEIEVSDIDDSWDRSSKTRRHIKK
Empoasca onukii		EonuOBP1		MWQLLVVFSLVGVALAEYDALIQDTMQKVQECKQKTGAQEDIDSLVNNLQIPTSPEGKCMVACVLEEMGLMKGDHVDANAVQSFVKTSVPDLPPTLIMMVTFTVTKCAKSGSGHDKCENATAFLNCMCQAAEANMCMFNAMTGHQ
		EonuOBP2		MKSTLLLVSLLVTLSYGALPREKKRAFLAECEKTHQTGLDIDEILDKWLIPTSDKGKCLMECFVLKKGLIDEKANINHATATPHFEESFPNDPQSVKKAESALKKCDALDLSQLDHCTKAVEILKCFRKNAKEIGLNH
		EonuOBP3		MNRLILLSVVLAAISLARADLDKAKALKLLEECQKKLGSEEDLNAMVEEKIIPTSEKGKCLLACAAEEKGFIDKDGKANFEKIMEYLQKKYADDEEKMEKAAKIVAHCSTAVDHTKLDKCEAANEYVKCAKEKKETL
		EonuOBP5		MGIQLKVITVLLSISSVTLAEFNRKVFIENIIDCMKDHHLTPQEIQSLGKPDFDEEKNKCYITCIGEKFGIIKNGELSEEGAVSAADNFFSKDDVEKKEKFQAIAKECSANMKTLSPKGCDIGPATKACLIKGAEERELLPK
		EonuOBP7		MNTLILLSVVFAAINLCQADLDKAQAIELLEKCQTKLGSEEDIKAMVEEKLIPTSEKGKCLLHCVAAEKGFVDEEGKVNKEAIGKYLEKKYGDDKEKMEKAAKIMALCSVIDVSKMDKCEAANEYMKCVKEKKETL
		EonuOBP8		MFVKTALICFISLCLFQENQAQQLSKKSVRKKLLEAVKKCKEEHNPPQGVGVTFFTNPEETDYTSKCFTECILENFQIMDTKGNYKKEKMQSFIKSLPDSRFKTSIESNLDLCLQTNADNKCEKGYRFIQCFYKRAVSS
		EonuOBP9		MKSAILLVSVLVTLSYGALPREKKRAFLAECEKLHNTGLDIDEILDKWLIPTSDKGKCLMECFVLKKGLIDENANINHATATPHFEESFPNDPQSIKKAESALKKCDVLDFSQLDHCTKAVEILKCFRKNAKEIGLKH
		EonuOBP10		MNSFVAVVLALAALVTVSQAGLDKKESIELLEKCKKETGATEDPEQLFTSQDIPTTPEGKCMMQCVLREKKLMKGDKVDAQAVSDFFEKTYADNPDQLEKAAGAVAECALLDVSGKDKCDVAVAYLECGKKKGFRL
		EonuOBP11		MKTINLFSIVVLCCVHASVQEDMSDQHKEIMQKLHNTCVQETGVSEDAISNAAKGTFAEDGKLSCYMKCLVVQLGVFSEEDGFDSEAFVEMVPDHMKETMSEVVNKCTPLSGSTSCDKIFQFNKCFYNVNPQKFVIF
		EonuOBP12		MTCKLTIFLALALLGVVSAKIDYEEAEKHFNICKEETGAEENFEDVVKKEKIPTSDKGMCLVECMFRQKGIYDKEGKYNTEGTRKYFSKVFAHLPDNIEKSVKITEECHKMDVEGLDKCEAAVKYLTCSRTKAVQQNIHLKD
		EonuOBP13		MSRTLVLQLLLALAVFSAVTAYNFHDALFNEVLADQLEDWDLSSRVRRDLSSDDEVVDKYLKCKHHHGKSCCGKSKWFKHFGDKSKNHLSECFDQFNEKLNATGITAGDDPFSCSRVNQMKMKVICTTECVGRKVQLIGEDGSIDKEVALKYIQKLELEGWQRPILESAVEKCAPVANSTKVSSPNTGDIECNTALLSLQHCLYQEVDKNCPEDQKKTDGRCKKHFEKQQINTE
		EonuOBP14		MQCVVVFVVCLVGLVAAEDTCVPTTGPHVHHGDCCNLAALTPFASMFVSVTCRQKYPKPARPTTIPTTPDPAFVRQEICYGECVFSENALLGSDMKLNVAAVRAKFVSTDATLGPVLSAAITKCLATPASTDPAIECKSGAGEFLKCVKRDLFANCPTSLWTSSTECEALKTKTANCPTLPVKLWHSGRGRGGGGGGGRRNLTG
		EonuOBP15		MQQLSVCVAVLLCGQALSQVVLQELDPDCIPKPGEKPGVHARDCCDIRDSIPESIKQAHVKCIEKIGLPPPPTGVPTGPPPPEVLNKFATIDECVFQEINLLTEDKQLDEEAVRKYFTSPDPELNSAKQTAVDKCLSSYKAEVDPAGEVKSGAREFKLCYMREEFLSCPPSRYKGGDECDALSAKLIKCPNLPVFLGPPNISV
		EonuOBP16		MWSPLICLFVIVSTTRALEEQHVENKPLCVPPASAPAKLEAIIEQCQDEIKQAVLEEALQVLGDAGRQLAQAGSSSARSKREAFSGEERRIAGCLLQCVYRKVKAVDESGLPTVSGLVRLYSDGVTDRNYFLATVQAVQQCLTTANTRRALNTQSVQDGAYTCDLAYDTFNCVSDRIESICGRTP
		EonuOBP17		MASVSVVAVVVLLACSALCAEDDPSCFPQPGEKRVHAGDCCDVKDSFPESMKEAHGKCKDKVGLPPPPKEHPTGPPPPEIKNKFICAAECVFEELSLLTEDKQLNEEAIRKYFSSEDADLQAVKKAAIDKCLSTYKEQIDSSLDCKSGAAQFKKCLGREVFMNCPAARYKGGEDCDGLKEKVPKCPNMPLHLGPPPPHHKPE
		EonuOBP18		MVWTVLVVLGSALLVAGQGDVDECKPPGGLSDLLVWAGGCCNLDDLLPESFLQSETSCKRRNPIQPLPESGGKSYNQEDLQNYFLCLDECIFKDLSLLTADRRMDHAAVSRYFTASSSDLSPVLDLAVDKCLRVYDRQLDMKVPCHSGAQQLRKCLYREALLACPRSRFNSSPDCDRVQAKVASCPNAFVLLGPRPVSW
		EonuOBP19		MKLILLLICSLRTVFAIDQCASTTQHKPGDCCNIANSVAFTSMFHSPVCRQLVPWPSDAPPSTFDADRHHICRDECIFSENRLLTEDLELDMTKVVEVFMSSDEAMQPVLNSTVENCMYSYKSHVRATSECLSGAYEFSKCVFREIFINCPAKFWTDNKECDGLKSQAMKCPEIHLKLWRRGPPRFFD
		EonuOBP20		MNCLVVLSVVFAAIHVAQAELDKAEALELLEKCQKKLGSEEELEALIDEKRIPTTEKGKCLLACMAEEKGFIDKEGKVNHEAISEFMEKKFGDDKEKLEKAAKVIALCNTTVDTSKMEKCEAVNEFTKCAKEKKETL
		EonuOBP21		MQWLVFSVLVSLTVSWTVADDDECRPKPGEKHVGVRDCCKLELAPATMEPAMKKCMEKFPHPKPPSGPPSGPPSKEMKNAHACMGECFFTEENLLTSDKQVDKDAVIKYFSTASPDLAPLVKKATEECFKSYMADVDPTSECKSGAEQFKKCMMRQIFLNCPSASYTSSADCDAFKAKVEKCPNMPMMMGPPPK
		EonuOBP22		MQWPVVTVLVSLSLSCALADDECRPKPGEKHVSVKDCCKLDLSPSSMQATAHKCFEKFPHPKPTGPPSGPPSAEMRNSHACMAECFFAEEKLLTADKQVDKDAVLKYFSSWNPEWTPLVKSAVDECFGSYMADVDPTLECKSGAEQLKKCLMRQLFLNCPSAAYTASAECDGFKAKVEKCPNMPLFMGPPGGPPK
		EonuOBP23		MTCHWCCVTTLLLALALAAARPQEEPEDCLPHGPSHPHHPPHAVDCCDLQDMIPETMRAAVRSCFHTHPLPHPPHPDESTGEPPLPRGPPPPEVLAKHACHDQCVFQNLSLLTTEKTLDKDAVKTYFTVSDKDLAAVVDAVVDSCLASYMEDVDTSLECSSGADQFHKCFGRQLFLNCPKDKMSDSEECMQFKARVEKCPKMPVHVGPPKKHHH
		EonuOBP24		MQQYMAVLVVVLVAAAGAEDDASCHPQPGEKRVHAGDCCDIKDSIPDAWKTAHDKCKETVGMPPPPKEPPTGPPPPEVKAKFHCMVECEFQELGLLTGDKQLDEEAVKKHFTSSDEELAKVKSAAVDTCLAQYKEHIDATQECKSGAASFKKCFGRQLFSNCPAGRYKAGDECDALKAKLAKCPHMPVFLGPHPPPPPPAK
		EonuOBP25		MYIPVSVVLTVLMALGVSPAAVEDPSCLPQPGEKNVHAGECCKVEYPVPKTMTDAVKHCMKTHPLPSPHVHVDPLPELRAKLACMGECVFQNLSLLTEDKVLDKDAVKSYFSELSGHTVDTLVDKCLDMSAADVDPSYECKSGAEEFQRCLSRQAFLDCPEDKFSDSEECQAYKAKVAKCPMVPVFMGPHHHHHSES
		EonuOBP26		MPKPGDRIERVGKCCKMADFIPKSMEKATETCLEKMFHLKLDNLPGPDGKLTQEMMDAHHCFMECLYKEEGLLTSDDQMDKEALVKYLTSVTTGDVTATVKSAVETCFSTYKEYMEPSPKCKSGAAGLVHCLTHQVFTNCPESIWNSTPECDNVKAKVSKCPKIPLDFSAEP
		EonuOBP27		MPMGPHLHHGDCCNVAALAPFATMFMSYTCMQKYPRPPKPAVLPTTPDPAFKRQDICYNECVFTENALLGADLKVSPTAVAAKFVSTDATLSPILSAAVTKCLGVYASTIDAAIECKSGAGEFTKCVSTEVFNNCPSTLWTASTECTALKTKTASCPTLPVKLWMRGGGGGRGGGRGFMNG
		EonuOBP28		MAQVLLLVVSVVVAVAADECMPPKPEEMKGKMDPWKCCDLAKFFPEKMADSFSTCKEKHPLPPKPSGPPSGKPDPEMMKMFTCAAECVFTEAGLIKGGKPDKEAIKKVFISPIKDNKELEEVTNAALDKCYDSYVAEIDTSLECKSGALELEKCMLREVYMNCPKDNWNDKPDCVDIKTKLMKCPKLHILSLNPGHKE
		EonuOBP29		MQQILFSVVLMVVAVAGDECMPKPEDGKGKMKPWQCCDLKKFIPEKFAASFMACKEKNPLPPMPSSPPAGGPNKEMMKAIACAGECVFKEAGLLKDGKPSKEAIGKLFSSVGDKDMEKVLNNALDKCFDKYAADVDTTLECKSGAMELERCMLREIFSNCPKDHWTDKPDCEDIKAKLTKCPKMHVLPMNPTGE
		EonuOBP30		MMWLRTLLALGALSTTLAEDQCEPQPGGVLMECCKLGDLLFPPSIDSSATSCRKKLPPLNPSNWTQSAKNAHACLVECIFAEEGILTQEKKVDKEVAVKYFTSSNSSLTSMVKTAVEKCIQSYEADVDQTLHCKSGAGELKDCFLLEYFLDCPSASYNPSPKCDEFKSKVKKCPGMRLSWW
		EonuOBP31		MLQILSLVVLVAAAVAGDDCMPPKPEDMKGKMDPWKCCDIEEYYPEKMASAFMTCKEKHPLPKLSGPPTGPPDPAVKKVHACAAECLFKEAGMLKDGKPDKAATLKVFLSTTGDNKELVKVTNTAVDKCYETYMSEVDTSLECKSGAMELENCVHREVYLNCPKDNWTDKQDCEDIKTKLTKCPKIHILSLTPGHTE
		EonuOBP32		MAAVASARARYLLLLLVVLLATSAGRAGADDCAPLKHVDAQTCCDMAGLFPDKMMEKFDACRAKYPLPKQTSGPPSDEMKKVFACTAECVFKECGLLKDNKPDKEALHAFFKDSDQENKELGESFKAVADQCFTEYAAQVDASLECKSGALELETCVLRNAFLQCPKTLWTDAAGCADLKAQLIKCPRMHPFSHL
		EonuOBP33		MFNSMVADTLEDWEMTSRVRRDLPVSASAADDEDVDKYLKCKHHHGKSCCGKGRWFKHFGDKNKNFLSECFDQFNEKLNSTGLAAAGDDPFSCSRVNQMKMKVICTTECVGKKSELIGEDGSIAVEKARDYIEKLDLEAWQRPILEAAVTTCAPTANSTKVSSPDTGELQCNPALLSLQHCIYQQVDKNCPENQKKTDGKCKKHFEKQKPGNDS
		EonuOBP34		MNTLILLSVVFAAINLCQADLDKAQAIELLEKCQTKLGSEEDIKAMVEEKLIPTSEKGKCLLHCVAAEKGFVDEEGKVNKEAIGKYLEKKYGDDKEKMEKAAKIMALCSVIDVSKMDKCEAANEYMKCVKEKKETL
		EonuOBP35		QPVLVSKRAIGNCYTQMRLPFGFFDNLLHTRRVPATPIEACFLGCVYREMGFLRNGGVDVEFSKKVAHILYASQPQKLIQSLNIIDICSAELKNVNDECQLGHRSRECFLRNSDPSFTPFEILNTN
		EonuOBP36		MKSKLFVIVIFATICASIKGDASEQQKEIMQKLHAFCVKESGVSEDAIAAAAKGTFAEDEELKCYMKCIFVQIGVYSETDGSFDGEAFVEMAPDKMKEALPGILNKCTPFSGSNSCEKIFRFNKCFYDTNPEVYMIF
		EonuOBP37		MSRTLILQLLLALAIFSAVAAYNFHDELFNEVLADQLEDLDLSARVRRDLSSDDEVDDKYLKCKHHHGKSCCGKGKWFKHFGDKNKSYLSECFDQFNEKLNSTGITTGDDPFSCARANQMKMKAICTTECVGKNVKLIGEDGSIDKEVALKYVEKLDLEAWQRPILQAAVDKCAPTANSTKVSSPHTGDIECNPALLSLQHCLYQEVDKNCPEDQKKTDGRCKKHFEKQPQHSE
		EonuOBP38		MVTNMDTGGTLFKFTVFLVFTTLLLMVVGQELDPEKMYKMCQQKSNATDDELSSFLKSQSIPTTEHGKCLLACIFENTGVLTKEGKYNADGIYEMAKRSYDKSPEQLVKAKKVVDTCAKEVEDSVNKCEAAVKAANCTMVVSQKVGLGSA
		EonuOBP39		MTSKLTILLPLALALLAHVAHAKIDYEEAEKHFNTCKAETGAEETFEDVIKKEKIPTSDKGMCLVECEFRLKGIYDKEGKYDPEGTKKYFSKVFSHLPENIDKSVKIAEECSKMDVEGLDKCEAAVKQLTCTRAKAVQQNIHLKD
		EonuOBP40		MFPLRLALLVLTALLCSLHHSQQAGIDQTKALALLNKCKSQTKAKEDTSVILTKHEFPTSPEGKCMMHCVLENKGLMKGNKVDSRAFTQYFEKIFADSPQDLEVAAKAIAACSAVTKEAEEKGVDKCELAVQLFQCGKRNNLRLN
		EonuOBP41		MRRFLVAATVTLLAVLQVAMAGVDRQEAIDMMKKCQKETGSPEDVEELFDSQKIPESREGKCMMACVARAKGLMRGDEIDIKTGTEFFERTYADDPEQLEKGAAIIGKCSTVDVSGMDGCDKAAAYAKCGQENGFRI
		EonuOBP42		MKTFLAVAVLLTVLSLAQAGLDRAQSIATLKKCQKETGAKENVEDVFDKQIIPTSKEGKCMMACVLTEKGLMKDNKVDATAVSNFFEKVYADDPEQLEKAAGAVGKCSLIDVKGLDKCDVAVAYMKCGQENDFRL
		EonuOBP43		MGPNIAIVIVSLASLCSVQAMFDTKVLMDHMQGCMKKHEVSEKDLEDVNKEDFSEEKLKCFMTCIGERIGYIKDDEFSEKGAMEAVEFMFEKNNTKEKEKAREIIKDCTQKIKEKDVKGCELGPVAGACLKKGVQDHKIMP
		EonuOBP44		MWRLLLIFCLAGASVAECLQFDALIQDAKKKAEECKEKTGAQEDIESSVNNLQVPTSPEGKCMVACVFEEMGLMKGEHMDADAIYTFVKTSAPNLPLGLSMMASVTITKCTQGGSSSDKCENAAEFLNCIAQAAKANEQMLTAMMG
		EonuOBP45		MSSNVCIVVVFLISFYSVQAMFDSKILMDHMQSCMKKHEVSEEELEEINKENVAEEKLKCFMTCIGERIGYIKDDEFSEKGALEAVEVMFEKNNTKEKQKAREIIKDCAQKIKEKGDKGCELGPTAGACLKKGVQDHKIMP
		EonuOBP46		MILASVVLVAAVSVVRADDCAPPKPGDKMTPPWECCKLTDSDFVMPQVIEKAMKKCSEKNPLPKPPSPGDMKGGPSTELKNALSCAAECMFSEAKMLTADKMLDKDAIIRVFTSISKEDKNWGPVIPKVVEKCLASNSDEIDKSLECKSGAKELEQCLMRESFLGCPENAWNDQASCKELKNKVSKCPSIPIMLLKPNMKVN
Bemisia tabaci		BtabOBP1		MMDLKAILLSLFVVTLSLVGITHAVTHAEMDQLAVACNGQKADIDVMKQWRVPSSDSGKCLMKCLTDYYKMFDSEGKYSLKNTEDSLYKAWSEKPKEHMPIIAQHCDNMMRSAPKENLGSCQMSYDTMKCINEKAWELGWFN
		BtabOBP2		MAMRALIGLFLVAAFFVQRCKAESTTPIPMPEEEDELPARFRSRVVRSASEEKSKEDSSEECGPPQHHHPHPHKPPPECCKGLPRPCNPTEDKKAWDTCVNKLSKKNPTTPQPTTQANGGKPGHGPMHGIDKQCMVECVYNETGLLTPDMKLQEAKISQKLTDKLKDTKFASMAPSVISKCFEKAKNAKDPKECKSGAGEFSECVNRELFMNCPTESWTNSEECQKMKEKLTKCPNMPVPMSPPPKP
		BtabOBP3		MSASTARCVGVVAAVFVLTIIAAVAAYDFEDAAFNARLIGDLDEYAVSSARNRRDADLDVDEFFQCKQRNQKVCCGKSSLFKNFGDKDKTAGKACYREIAEKLKRKDDLDEDLMDIFSCEQIKQMKKKHFCIHECIGKRKNLLNADGSINVLNMRTYLKKELFTEEWQQKVGDKAMEKCFNEKYVSSWPDSDSSDVKCNPISVQFQHCLWKQIELNCPDSEWKDTRRCNKIKEYLRKQELSQKNKISKN
		BtabOBP4		MKSFIAVLAVLFVFACVQAQDAKQKVAAVAEKCKTEVHGGHDVLRIVGTSELPKTEEQRCFLECVYKNLQLIVDDKFAEPGAKRLMMMKYGSNPDQLKIAQTEIETCAKEVKPTAGMKCSLAHNIRQCFAKEGQKRNFYIKA
		BtabOBP5		MSSLRPVQVTVLLGAALLVGLAAAAPNIQLQGSFANCKAPATAPQKLERVVEVCQNEIKFALLQEALNLLGLGIADDDSSEEEEPVKESKNRTVTIAPAKSRPKRDSSFSQEERRVAGCLLQCVYRKVKAVDDTGFPQAEGMVRLYSEGVQDNNYYSATVQAVERCVSFAQALKLKQPNQKFASGQTCDLAYDMFECISEKIERACGGAAP
		BtabOBP6		MQGEVCFALLVVCLLHVTFIPDVETAVSEQMIKQMKDMHKKTCMARSGVKKEGLAKFMEEGVNDDPAFKKYTLCMLKNMQGSKNGKIAIKDIENQAKAMLPPPLRDAILDATSKCSNTGGDTPEDITYNFSKCSHKANVKSVMII
		BtabOBP7		MGGGGRPWSQNTQDSGRGGGNGGGRHQSNQYGNQNNDRYCSSGYQNSDRDRPRFSSSGSGGGGGGGNDDDFYTKTQSEQRFRGDGGGGGRTRPGQYRVKVQYGSGQGGGPDSRAYPLGRKRRATKIISNNAKNATGRNPTSSETGKTSLLEELDACVVQCIFRQMEMLTEDARPDKNSVISVMTQRIRDPELKEFIQESIEECFDIIESDAEGGKCEYSKNFAMCLEEKGRRNCEDWEEAAQINRFKGIQSGMSPPDTTNNYNPPNFNNFNSNNQGNRQNAFYNYNGK
		BtabOBP8		MNNLMVFSILLYLQYLLAVKADQGNQGHQGQQGNQSEDQEKVKAIYQKCQQESMAEEKDLDNFKKMEMPSSEKGKCMMACLMREAKIIVNKRFSKDGAMALAQRYYSTQPQNMDKAKQVIVACDKQVEHERNECNIAGKLAECVVTEAQRVGLTSVPKG
Nilaparvata lugens		NlugOBP1		MKSFIVCIAVSYLLVANIKADEATSSSDAESLITSTTLSPASNESDAARSAIKEQLAKLTESCKTSSQANSDDAKIIGTESVPKTEGEKCFLQCVYTGFGIVKNDQFSVEGARLLAQKRFGAFPEELEKANQLIETCSKEAVKKDSKDKCPMGFLIRQCFVKNGQKINFFPKA
		NlugOBP2		MKCQIVLAALALATICEVSYAGLTPDKLKELKPLIDTCIKQSKVEEDTLGKLHNGHEIPSSQSGKCFIACMAEHMKLMKDGKFEPEMTMEFIDKMVQDKDKAAEIKKSLGECIKSVPEGDKCEMAAGLATCMKDHHAELAGMN
		NlugOBP3		MKASAAITLVFLSLAVFHCSEAKLDKAKKEAAIKKCQAETQATDEDVMKVRKEHIVPDSEEGKCFIACGFNSYDMLKDNRINLEGVNAFFEKLYDEQDKRDIAIKAAASCAATETVSGLNECHYAAKYFACMQRHPDFAKMKDDFDI
		NlugOBP4		MERTSVLIVFTFIPFLSSVLGANFLMMQQSMQGTQMPMIQSIASELKFCMDVNAEQNSDGLNDYLPLLFNEELPSTLGQKCFLTCLFNRFGLLKDGFLDTKTAKNLVETFYADKHDEKTMANIAINVCHVAAVPDALNPCEIGFSLKSCFVDSNKKGKELRGKN
		NlugOBP5		MGIYTTNLIFTLLGSAVVSGVFIDGRNEYRLTRQAPPDDECRPPRPGPNEDGVCCDMPPVFRTAHDKFESCLEELSSIFPPPPPPPHGHHGPPPPPPGARGPPPPPPPGGRRGPPPGFGGPPGHEPPIFACAHECLFNKTGMLENGKLNVEALKKKLEDELGENEVWKNLVQSIVDKCMESKDAPSNEMCTSGSHELARCVLRDMFMNCPQEKWKESDDCSNMKMKLEKCPELVPPMAMRLPHPPMP
		NlugOBP6		MSTFHKFVISGMVVLAGALFVTAEDTTIKIKTPSPHKHQQVYCQAPPTAPERLERIIEQCQDDIKTALQEALNVLTDTSPRDLVKKTRSKREVFSGEEKRIAGCLLQCVYRKVKAVDDQGMPTVPGLVRLYSEGVQDRNYYVATVQAVQQCVSASQHFRYYNPQVLKEDGYTCDLAYDMFNCVSDKIEAFCGRTP
		NlugOBP7		MLLEVCRFSVFLIALFATVNGRFTEEEKQLMNQVHSQCISETGTSEDLVTKATTGDFADDDNLKCYVKCIWSTLTVMDDEGNFDVGVLEVMLPADMKDTVMKAMNACTGVGGATPCEKAFAMTKCLYKEAPSDFFLP
		NlugOBP8		MVTSALMQTATAACLLLVTAYAYDFSDPYFNEHLQSAMEEIMEEEMLSIGRVQRDADQGQEVADEYFKCKHRNLKTCCGKINLMKNYGDKGKIYGKQCYEEVVSAFKTNSSSTADDDDSMMDMFSCEKVKMIKLKHICVHECIGKKTKILKEDGTLNPEEIKQYAREYMFNEEWSKELGEKALDKCLSQTYNSVTKMLDEYEIKCNPSSVQFHHCLWKEIELTCPESKVDLKAKCVRLRERLRKQQAAGM
Sogatella furcifera		SfurOBP1		MNSLIVCVVVSCLLVANIKADEATSSSSPDADSLITSTTLSPTSNETDAARASIKEQLAKLTESCKTSSQANSDDAKIIETESVPKTEGEKCFLQCVYGGLGIVKHDQFSVEGAKLLAQKRFGSFPEELEKANQLIETCSKEALKKDSKDKCPMGFLIRQCFVKNGQKINFFPKA
		SfurOBP2		MKCQVFLASFVLVAVFELGYAGLTPEKLKEIKPLIDTCIKESKVEEETLGKLHNGHEIPSSQSGKCFIACMAEHMKLMKDGKFEPAMTMEFIDKMVQDKAKADEIKKAVDDCFKSVPDGDKCEMAASLATCMKEHHAELAGMN
		SfurOBP3		MKASASLTLIFLTLAVFHCSEAKIDKAKKEAAIKKCQAETSASDEDVKKVRKEHVVPDSEEGKCFIACGFNHYDMLKDNRINLEGVNAFFEKLYDEQEKRDIAIKAAASCAATESVSGLNDCHVAAKYFACLQRHPDFVKMKDDFDV
		SfurOBP4		MNTFQKFIFSGMVVLAGAMLITAEDTTIKIKNQQSPHKQQQVYCQAPPTAPERLERIIEQCQDDIKTALLQEALNVLTDTSPRDLVKKTRSKREVFSGEEKRIAGCLLQCVYRKVKAVDDQGMPTVPGLVRLYSEGVQDRNYYVATVQAVQQCVSASQHFRYYNPQVLKEDGYTCDLAYDMFNCVSDKIEAFCGRTP
		SfurOBP5		MVTSGLVQAVIAACLLLVTAYAYDFSDPYFNEHLQSAMEEIMEEEMLSIGRVQRDADQTQEVADEYFKCKHRNLKTCCGKINLMKNYGDKGKIYGKQCYEEVVSAFKTNSSSTADDDDSMMDMFSCEKVKMIKLKHICVHECIGKKTKILKEDGSLNAEEIKQYAREYMFNEEWSKELGERALDKCLTQSYNSVTKMLDEYEIKCNPTSVQFHHCLWKEIEMTCPESKVDLKAKCVRLRERLRKQQAAGM
		SfurOBP8		MLYVLYFVIVTAASSAVITQIMAADSNNPDMQTVFNNCREEASATEDDIKTFRAQQIPSTTTGKCMLACMFNHSGLMKEGKYNSEGALKLVGQVFAADPVKLGKAKTLINTCSDEVKNENDKCEIASKIADCTVKMTSQVGLS
		SfurOBP9		MERTHVLIIAFAFIPFLSSAMQADFAMMQFPMQGTGTPMIQSIAGELKYCMDVNAEQNSDGLEDYLPLLFNEELPTSLGQKCFLTCLFNRFGLLKDGFLDAQTAKTLVETFYKDKHDEKTMANIAINVCRVSAVPDILNPCEIGFSLKSCFVDSNKKGKELRGKN
		SfurOBP10		MSTLLNFVFVFLVCLCSYSEAIPALTEAQIEQVGKAMANMCISSSGVQRSLITKAMTGEIEDDRKLKCFFGCIMEAVQVTKNGKMQPEVLKRRANAMLPKTMREMILPTIDSCSHIENEDKCELAYSIVKCHFSVNGKNPFFFNF
		SfurOBP11		MLLEVCRFSVFLLALSATVYGRFSEEEKQLMNQVHTQCVTETGTSEDLVNKATNGDFAEDENLKCYVKCIWSTLTVMDDDGNFDVGVLEVMLPADMKDIVMKAMSACIGAGGGSPCEKAFAVTKCLYKEAPADFFLP
		SfurOBP12		MRGYILVLCVLLFMRGMASGLVAAELEKLKNSCLKKSGATEDTARRLVGINVVTENHVESCFLTCIYKGLKIVSSDNKFQPDTVKKIADDHFLGRNLKVTYQIADSCTKEIKADPADKCSIGASFRNCFSKYGKELGFFPHM
Laodelphax striatella		LstrOBP1		MNVKMSALLKVGLVFLVYLCSYSGAIPALTEAQIEQVGKAMANMCISSSGVQRSLITKAMKGEIEDDRKLKCFFGCIMEAVQVTKNGRMQPEVLKRRANAMLPKTMREMILPTIDSCSHIENEDKCELAYSIVKCHFSVNGKNPFFFNF
		LstrOBP3		MERTRLFIILAFMPFLPSALGANFAMMQQSLQGTNIPMIQSIAGELKFCMDVNSEQNSDGLDDYLPLLFNEELPTTLGQKCFLTCLFNRFGLLKDGFLDTQTAKTLVETFYKDKHDEKTMANIAINVCHVSAVPDVLNPCEIGFSLKSCFVDSNKKGKELRHKN
		LstrOBP4		MKSLIVCVVVSCLLVANTKADEATSSKPSSSPNAADALIASTTLSPASNETDAARAAIKEQLAKLTESCKTSSQANSDEAKIIGTESVPKTEGEKCFLQCVYTGLGIVKNEQFSVEGAKLLAQKRFGSFPEELEKANQLIETCSKEAVKKDSKDKCPMGFLIRQCFVKNGQKINFFPKA
		LstrOBP5		MKCQVLLALFVVAAVCEVCYAGLTPEKLKELKPLIDTCIKQSKAEEETIGKLQNGHEIPSSQTGKCFIACMAEHMKLMKDGKFEPAMTMEFIDKMVQDKDKAAEIKKAVDDCFKSVPDTGDKCEMAAGLATCMKEHHAELAGMN
		LstrOBP6		MLYVLYFVIVTSALSAVITQIMAADSSDMLTVFNKCRDKTSATEDDIKTFRAQQIPSTTTGKCMLACMFNHSGLMKDGKYDSEGALKLVGQVFADNPIKLGKARQLINGCTDEVKKENDKCEIASKIADCTVKMSSQVGLS
		LstrOBP7		MKASAALTLVFLALAVFHCSEAKIDKAKKEAAIKKCQAETSASDEDVKKVRKEHVVPESEEGKCFIACGFNTYDMLKDNRINLEGVNAFFEKLYDEQEKRDIAIKAAASCAATESISGLNECHVAAKYFACLQRHPDFVKMKEDFDV
		LstrOBP8		MITSALTPSAVLAACLLLATAYAYDFSDPYFNEHLQSAMEEIMEEEMLSIGRVQRDADQGQEVADEYFKCKHRNLKTCCGKINLMKNYGDKGKIYGKQCYEEVVSAFKSNSSSTADDDDSMMDMFSCEKVKMIKLKHICVHECIGKKTKILKEDGSLNAEEIKQYAREYMFNEEWSKELGEKALDKCLTQTYNSVTKMLDEYEIKCNPTSVQFHHCLWKEIEMTCPESKVDLKAKCVRLRERLRKQQAAGM
		LstrOBP9		MSRLHKFAISGMAVLAGAMLIAAEDTTIKIKNPSPHKQQQVYCQAPPTAPERLERIIEQCQDDIKTALLQEALNVLTDTSPRDLVKKTRSKREVFSGEEKRIAGCLLQCVYRKVKAVDDQGMPTVPGLVRLYSEGVQDRNYYVATVQAVQQCVSASQHFRYYNPQVLKEDGYTCDLAYDMFNCVSDKIEAFCGRTP
Apolygus lucorum		AlucOBP1		MKSFVGLIFAVALVEFASAITKEYHDRAVAAKDACLKKHPSIKESDVQEFLKKHKLPETDDGKCMIACYMEEMNLMADGKINVEEAKKTNSDKYDGEPDNKELADKLIDHCSSQVSPDGMSKCEYAYQISKCGLEYGMKNGLTPPKMYEEQRR
		AlucOBP2		MTYHVFFRKFDLPRISRRVRQCYYHSVPRSLSGSSRRMLEETSQHHPKRRSRVSEKHKLPETDDGECMIACYMEEKNLMADGKINVKEANQTNSDKYDGEPDNKQLAEKLIDHCSSQVSPDGMSKCEYAYQFSKCGLEYGMKNGLTPPKMYEEQRR
		AlucOBP3		MKTFVGLIFAVALVEFASAVSKEYHDKAIAAKNTCAKLHNVDDETIMKFWKAHQLPEKEPETCIIICYMKEMKLVVDGKVDADAWKASNKEKWDDEKHVAAADEIVDKCSAEVPPTENECEWGLALTKCALKHGKEAGIPPPDMEHPKRR
		AlucOBP4		MDTHFGLLIASLAILHTANAVINKDYLEKVVTAKDKCLKEFNVDDSVVEDFIVRYNKPQSESGKCMVACYMEERGMMKDGKTITEQVMLDNQEKWIAATHVNMGKEVIDTCDKEVPNEKNDKCDLAVDYMMCLVKRGDEAGLPKMDVAQLKH
		AlucOBP5		MNSIIVLCLVASAVTLSQGNPTTPNPSTSHVSSSAGITVSGVSKSPEEIKLKIKEQVATLTGACKTQTKLTGEQAKIVASQAIPKTEAEKCFLECIYQGLQLTKDGKFNEPAARAWAQKRFGNAPEDLQKANTMIDICVKEVVVKDENEKCALGRLIRECFVKNGAKINFFPKP
		AlucOBP6		MYDRFKLFALLALVVSCKSAPPEEPAECKLPESDSAELVKCCKLNVVLDEMADSVGECMKLVKGKPEKGPPVPEGFDCMDTCVFSKLGFAANNKLDAEKLTKKFSELFKGDWSALSDSTLKKCLPMAEGAKGSCASGADVFKFCIVRELYMNCPASSWTKSDLCKANVERLEKCPHSMPFLPGTGIKKN
		AlucOBP7		MNPLILILLVVFAAATRGEEQANALVAKAFNKCFGEFPLGDDEMKEVKDKSTVPSSHNAKCLMACMLKEGRILRGGKYELENAILMADVLNKNDHAATDKAKQLIETCAAQVGTDASADECEFAYKMALCASDEAKKLGVRPPDF
		AlucOBP8		MVLKMKQILVVFVALQVLISTTEAVMTQAQMKQAMKTVRNMCIPKSGVDKEALAKMVEGEFDESDQKLKCYLGCVLGMMQAVKNNKINLTMVKNQISKMLAPEQGQRILAAFEGCATVTGDDNCDLAFKFAKCIYDTDKELLFQAFIVP
		AlucOBP9		MKSFVGLIFAVALVEFASAITKEYHDRAVAAKDACLKKHPSIKESDVQEFLKKHKLPETDDGKCMIACYMEEMNLMADGKINVEEAKKTNSDKYDGEPDNKELADKLIDHCSSQVSPDGMSKCEYAYQISKCGLEYGMKNGLTPPKMYEEQRR
		AlucOBP10		MTYHVFFRKFDLPRISRRVRQCYYHSVPRSLSGSSRRMLEETSQHHPKRRSRVSEKHKLPETDDGECMIACYMEEKNLMADGKINVKEANQTNSDKYDGEPDNKQLAEKLIDHCSSQVSPDGMSKCEYAYQFSKCGLEYGMKNGLTPPKMYEEQRR
		AlucOBP11		MGSQYERTLVGVRYLPIMKRVKFILVLSLLSRCSSAPTDDMAACMQITNEDSASMATCCDYVIPFSNKTMTTCDKKETSGEMSKEFECVQDCLFSSDNVLGADKKFDPVAWRKHATNTISGDWKGVIANSGSNCEGFKKVLAQSMEKKCPTSESDVSFNCMTLQWYMNCPKSAWTSSESCEASKKKLMSCFGPIFENTS
		AlucOBP12		MTCSHFIALLSVVALSLSSGEINEECKDIENLKTQLENFYGCCDFESMIERVVRTEEEVETDRFCREERKKINSTDGKVPLASEGHDCFMECVLKRMGAMGQDFKFIREKLDDFFLRGYPEEVKQAGKLAFDKCLSKNFSKKYCASGINGLMMCLPEELVMNCPANIWSSHESCPIAKEAIKKCPSYRVMIEQE
		AlucOBP13		MKHSSCVVPVALTIFVVAIVSGFKELDDVLPKPKQDECRKESNFQAELPSDINQNITQELKCFAACSLVKLGLMNEKDGTINMAQLEDLIAKHTGGKDAADMFKHTVVEPCMKEVNKTTDYCEYSFQLVKCGMSKVKPPSTGTEG
		AlucOBP14		MALNAKAVLLLGVCGLVYVSAYQEVLKATLKDCKGGKEITQEEVDEFMKPLIPKNEEERCLMACVFRAYNVIVDGHFDPKLAYGVAKNILHENPEKLKHIKETLDYCGHEIPTKMDNECDLAGEVMSCRNKYNIDHGYDQDP
		AlucOBP15		MMRPTAYYLFASYAALLVCVHFASVSAITPELDKRAKAAVAKCADVPRTDEAKKEDCHAGCFMSAMGYMTNGEINVKNMEEANKQKWDDQEIIKKGIQVDTTCAKQVGDTKGKSECTIGYEFSTCKKELVKKVGLPPPTPLKE
		AlucOBP16		MKRLVFVLFTLCSLQWVSGITDELKQKAQAARLTCKQQVGLSDKEFNDWVKGIALPTTDGGTCCEVCACWMRELGYLTGGRVNLENMKAVNAQKWNNLAYVELGNKIDALCSDRVLQTGRKECEIAVDFRKCKTELIQQFGGPPKPGST
		AlucOBP17		MRILVLFTAALTCVLAGELPEEMREMAQGLHDSCVGETGVDNGLIAPCAKGSFADDPKLKCYFKCVFGNLGVISDDGELDAEAFASILPDNMQALLPTIRGCGSTTGADPCDLAMNFNKCLQKADPVNFMVI
		AlucOBP18		MHAAIVLIGSALLVAYVSGAPSANVKEIVQNVSKKCAAETKASPDQAKIVLSKNIPKDDAERCFLQCVYTGVGVIKDGKFSEEGGKKLVALRFHDAKEKELANKLIATCAKEIKAKDGEKCSLGRAVRECFVNHGKQVNFFPSA
		AlucOBP19		MNSRFGIVFASLALLHITNAGNIKEGYVAKIAEIKDKCLKEHNVDHSVVEDLLKKSIKPEVKAAQCMVACFFEENGMMKDGKIVSEMVKSNNAHQYEDPADVEKANEASDMCDGEVSTDGKDKCLLAADYALCWVKRTEEAGLPQIDFANSS
		AlucOBP20		MYTFKTFFVLTLASYVIAAPPADEPAECKPMKEKEEEISKCCKLEPVTVKEQAAFVDCMKLVKDTDKKGPPKPEGFECLDDCILSKTGSLGSDKKIDPAKINAAAKTTYTGDWAEPGAKMVEKCLAQVAENKDKTVCSTSGADVYTKCIFRESYINCPEKSWTNSDACKANKERVIKCPKTLPYNAEQHKAETR
		AlucOBP21		MKFFVVSAALVLLVAAAVKANEKKANEKVTEIFNKCKETWPVTDEEIEQVKQKQSIPDSKNVKCILACMLKEAKILRDGEYNKDNAELMADVLYKDEPEHAEKSKQIIEMCSSELGTKTEGDDCEYAYKMSVCASKHAKELGVKTPEF
		AlucOBP22		MSLKIHFFVFAAIGAACVCAYQDQLKQTIKDCQGGKEVTDEELEEFTKPLIPKNEEERCIMACVMRTYNIINNGHYDPKIAFGIIKGILKDHPEKLDRIKEVMDHCGEDVPQHMDNECDLAGEIMQCEVKYQKAMGLN
		AlucOBP24		MSTKLRSVGMILAIAITHVCAYQEQLKETIKQCQDGREVTDDEVEEFTKPLVPKNQEERCLVACVFKEYKVIIDGHFDPVNALNVAKMVYKDYPEKWKRIKDVIDHCGEDIPTHNDNECDLAGDIMNCEVKYLNSMPKGVSLELLAGSIAATAEP
		AlucOBP26		MNPTVAIIFTLLVAYVKANTKELSPSEALKQKVKVQCQQEVKATPEQLKIYDNFKDVPKDDVENCLMECMYTKTGGIGADGKYSVEGFKKLVDMKYKGEENTKARKIAADCEAKAAPKEGEKCSMGRAIRECLAAATKENEFFTI
		AlucOBP27		MARKFIKSCYTLVALLVFVGSIHVEAKELTEEQRTQLFEDLKQCKNSTDLSDDEFETIIAKKELPTSEAGKCFTKCLMEKLDIIEDAEGGKKKISVITMQASLEENMEKEDDIAKGKDIIQKCGDTVEPEDSCAYAYNISKCIYDRMKEAGISQ
		AlucOBP28		MIIEIICVLTVGISPHFIEGQELPPPGGVGNKTAVFKESFIRTAKYCSSIHETSTVAVLAILMSEESDDQNGKCFLNCMLQRYQLMSKQGAYNKDKFKPFLDYIPESRFLQSIKGNLKTCITERDPAPCEKAYKFIKCFYTRARNKDEFGKIQRK
		AlucOBP29		MNRPLLLLTAVLAVGSGQQEDCKTAPAGWPRRPPQCCDLPFPLEGMKKEFGSCIRQIGNRQSSAVPTAQAVRDARLCIEECVYKGLGFMEEHNLNKDQILQQLTKGVADKKDWTKPMEDAVKSCHETITKRETPQEGTCKDSAHEFTHCVMRQLFLSCPASEWNNNDECNLVKSRMQACPNIPPPPPPPPQGFRGQGPPPPQ
		AlucOBP30		MNAHIVLCLVASVFALSQGTPTTPTPATSRRVTVAPEDLEQAKSLRKFCTAKTGFTGITTTETSKGKDQARTATTPRPKTQLEKCYLECLYTGLQLTKDGKFNEPGARALANKRYKNAPEELRKVNSIIDFCITEVVVRDIEEMCALGRLIKECFSKYGAKNFPEL
		AlucOBP31		MFTSATFTVFLFAVTLTRGQIDEDPECRPSGPPGKEPECCTIPMKLFGDEVQEAVVKNCFDEAGMKRPSGPHGGGSPPTAEEMAAHISAHECADECVFKSGNFIKSDGGLDEDAIKAVIAKLFTGDWAPIATAAVNKCLASAKSGVSASAKCKSGAYQLSKCFQRELFLGCPASLWTESTDCSAIKARITKCPNAKVPIGHHHKH
		AlucOBP32		MSGRHSLILVLLAAVTSAEVLTDGDCPKTMPKEMKPLYKCCVVEMDSNKTISDDQKAAVDSCVNTSKSDSDANKHDCMIECIFIKLGYMGEDKTINVDYVLKEMNSLLPEDFHEQTSKSLATCMGKKFSSTECPSEIDGVMACFSTMVLMNCPAKHWTDDEECKATRKFFQKCGDSIGYRYD
		AlucOBP33		MHPWKTTCLIGMTAALMVVTAFAGLPFQNEMAVMQCKVKFDVTAEDIQLLKDSKLPSSHSGKCMMACILKKMKVMTKRGQFDLRNVQKWLRNKYQGDQANLAKGNYVAEACANTLPTLGIQDECEMAAEIMTCVRTKSKLVKKTLNGELPKEVSP
		AlucOBP34		MEHWKWRLALLIFGMVTCVPQLEGAQKSKQPSKAKTKESQVVAARPKDARAAACVTQIGPDEEEEASFYRKEIPETDKGKCLLACYLESKGVLSGGKFSSSGAAKIAARAYPNNAAKTGNVKHILSHCGTIAARETEQCQLAYRLAECTTTLADKFKL
		AlucOBP35		MINVVFVLLIGTGIVSGGFMEALIECKQQHHVSKEEAMTGESEEVKCFSECVLKKSGMMSDNNEFDEEKIQAEGARMIKNDEQKNREFEGAAKACIEKVNGENPSEKCAKGHALFKCMKEAMPMSKMRG
		AlucOBP36		MKTFVGLIFAVALVEFASAVSKEYHDKAIAAKNTCAKLHNVDDETIMKFWKAHQLPEKEPETCIIICYMKEMKLVVDGKVDADAWKASNKEKWDDEKHVAAADEIVDKCSAEVPPTENECEWGLALTKCALKHGKEAGIPPPDMEHPKRR
		AlucOBP37		MDTHFGLLIASLAILHTANAVINKDYLEKVVTAKDKCLKEFNVDDSVVEDFIVRYNKPQSESGKCMVACYMEERGMMKDGKTITEQVMLDNQEKWIAATHVNMGKEVIDTCDKEVPNEKNDKCDLAVDYMMCLVKRGDEAGLPKMDVAQLKH
		AlucOBP38		MGFKFVKYRSYFFVLVIHIILCIQIKAKELTDEQKEQIFAEIKNCMESTKLTDEEFESIMAKKELPTSKEGKCFTKCLMEKMEYLEEGGKINVIAVQAGLEENMEKESEITKAKEIIQQCADTVPPEDSCEYAYGISQCMYTKMKEAGISGGP
Adelphocoris lineolatus		AlinOBP1		MNSLIPVLLVVCAAATRADEQTNAMVAKAFNKCREEFPISDDEIGGVREKTTIPESHNAKCLMACMLREGKMLRDGKYEKENALIMADVLNKDDPASADKAKQLVETCAGKVGTDAGGDECEFAYKMAVCAAEEAKKLGVRPPDF
		AlinOBP2		MSLKIQFFVFAAICAACVCAYQEQLKQTIRDCQDGKEVTDDELEEFTKPLIPRNREEKCIMACVMRTYNIISNGHYDPKIAFGILKGILKDHPEKLNKIKEVMDHCGEDVPSHMDDECDLAGEIMQCEVKYQKAMGMA
		AlinOBP3		MDIRFGFIIACLAILSVANAISKEYSARMIAAKEKCQKEFNVTDSVVEDFMKRNIKPESKSGKCMVHCIMEEMGMIDDHKINTEQVKLGNKEKWDDPALVELANQVADTCDQEVFTEGRCKCLVAVEYMMCLATHGDEVGLPHVDFEDSQDS
		AlinOBP4		MRIFVIFTAALTCVMAGELPEEMKEMAQGLHDSCVEETGVDNGLIAPCAKGNFADDAKLRCYFKCVFGNLGVISDEGELDAEAFGSILPDSMQELLPTIKSCGGTTGSDPCDLAMNFNKCLQKADPVNFLVI
		AlinOBP5		MVLKMNLLLVVLVMSQVFFSVTEAAMSQAQMKQAMKTVRNMCIPKSGVDKEALAKMVNGEFDESDQKLKCYLGCVLGMMQAVKNNKINLTMVRNQITKMLAPERGQRILAAFESCATVTGDDNCGLAFRFAKCIYDTDKEAFIVP
		AlinOBP6		MGFKFVKYRSYFFVLVIRIILCIQIKAKELTDEQKEQIFAEIKNCMESTKLTDEEFESIMAKKELPTSIEGKCFTKCLMEKMEYLEEGGKINVIAVQAGMEENMEKESEITKAKEVIQQCADSVPPEDSCEYAYGISQCMYNKMKEAGISGS
		AlinOBP7		MNRPLLLLTAVLTVGSGQQEDCKTAPAGWPRRPPQCCDLPFPLEGMKKEFGSCIRQIGNRQSSAVPTAQAVRDARLCIEECVYKGLGFMDEHKLNKDQLLEQLKKGIADKKDWTKPMEGAVKRCHETITKRETPQEAACQDSAHEFTHCAMRELFLNCPASEWNNNDECNLVKSRMQACPNIPPPPPPPPQGFRGQGPPPQ
		AlinOBP8		MDTHFGLLIASLAILHTANAVINKDYLEKVVTAKDKCLKEFNVDDSVVEDFIVKYNKPQSESGKCMVACFMEERGMMKDGKTITEQVMLDNQEKWIAATHVNMGKEVIDTCDKEVPNEENDKCDLAVDYMMCLVKRGDEAGLPKMDVAQLKH
		AlinOBP9		MMELWKWRLALIIFGLVSCIQQTEGSQRTKQQPKSKTKESVVGATRPRDAKATECVNKVNANEEESASFFRKEIPETEAGKCLLACYLEGKGLIVGGKISSSGAARVAARAYPNNRVKTGNVKHILSHCGTIAGRESNNCEMAYKLADCTTTLSDKFRL
		AlinOBP10		MFFNSVFLLVVCVSSYVTKGQELPPPGDVKNKTVVFKNSFLRSAKYCSSIYETSTLAIMALLMSEKSDDQNGKCFLNCMLQRYRLMSQDGSYNKDKFKPFLEYIPDSKFLQSIRGNLKNCISEKDPDPCEKASKFIKCFYTRARNKGEIGASKEVIPADGF
		AlinOBP11		MKTFVGLIFAVALVEFASAISKEYHDKAIEAKNTCAKLHNVDDETIMTYWKNHQLPEKEPETCIVICYLKEMKLVVDGKVDADAWKASNKEKWDDEKHVAAADEIVDKCSAEVPPTENECEWGLALTKCALKHGKEAGIPPPDMEHPKRR
		AlinOBP12		MTTKLRSIGLVFIVSISYAFAYQELLKETIKKCQNGRDVTDDEVEEFTKPLVPKNEEERCLVACVFKEYKVIIDGHFDPVNALNVAKVVYKDYPDKVERIKDVLDHCGEDIPTHNDNECDLAGDIMKCEVKYLNSVPKMTSLEFLAGSMAATAEP
		AlinOBP13		MNISTRMISLTMAYLAAALVSGHRALDGILPQANQDECREESNFRGELNDDVGRNVTQELKCFAACSLMKLGIMNEKDGTVNMTRLDELIASHTPGKDAADVFKTTVVEPCMKEVKKSTDYCEYSYQLIACGMSKVP
		AlinOBP14		MKPPGPPGSGTPPTAEERAARKIAHECADECLYKSSNLLTSAGELDKDAIKALVTKLYTGDWATAATTAIDKCLASAKGEVEATSKCKSGSFQLSRCFMRSMFLGCPASSWTESTECAAAKARLTKCPNAMAPMPHKK
		AlinOBP15		MVDHWCASRIHKRYHELTHSRVVGGLRCCDEDEQTNAMVAKAFNKCREEFPISDDEIGGVREKTTIPESHNAKCLMACMLREGKMLRDGKYEKENALIMADVLNKDDPASADKAKQLVETCAGKVGTDAGGDECEFAYKMAVCAAEEAKKLGVRPPDF
		AlinOBP17		VKEIVQNVSKKCAAETKASPEQAKIILTQNIPKNDVERCYLQCVYSGVGVIKDGKFSQEGGNKLVAMRFHDAKEKELAKQLINTCAKEIKAKDGEKCSLGKGIRQCFVAHGKEVNFFPHA
Acyrthosiphon pisum		ApisOBP1		MLNLKVMMFLCLSVIVVYCESDQVPINSSAAVESCLLETNMTRDEFEDMLTSPNARELTILKSHAHKCMFGCVMRKNHIVNDGVVSKEVLSKYVLNFYGRPDYKRRLIIKDVEHIVDVCAKKVADESETDECELAATLVTCIVLEANKAGLVDDPARQI
		ApisOBP2		MKVSAATAVLVALVATVQSSDPCNISTCYKSGTTKPPMAVTPTHLPVQSSSTQTSHPQTTYAKDHVHGSTTTKSGVNATVTTASGASVNGTEPPAVVKSSAGVTGNSTTPKPTMTEGHVALKQKLNTIAVKCKDELHAPQEIMALVSNTVVPQNEQQRCYLECVYKNLNLIKNNKFSVEDGKAMARIRFANQPEEHKKAVTIIETCEKEAVIDPKTTEKCAAGRVIRNCFVKNGEKINFFPKA
		ApisOBP3		MISSTFYITLVFGIAMLISCGHGRFTTEQIDYYGKACNASEDDLVVVKSYKVPTTETGKCLMKCMITKLGLLNDDGSYNKTGMEAGLKKYWSEWSTEKIESINNKCYEEALLVSKEVVATCNYSYTVMACLNKQLDLDKST
		ApisOBP4		MRGNYSSMVFLLFAIGFQDIFCQKQEPSGKCRAPDKAPLNLEIIINTCQEEIKSALLQEALDILNDGNVEQNTPNYSSRSKREAEEDLTNEERRVAGCLLQCVYKKVKAVDETGFPVVDGLMKLYNEGVQDRNYYIATLSAVRHCISIAQQLKQQQPSKSFDDGQTCDLAYEMFECVSEKIEENCGVENKSNN
		ApisOBP5		MSANSATIKCIAVAAILLQISVIFADAGHHRRGKELLDTEDSDFFRCKQASRKSCCGPENAMKRFGDKDKVAADECYAQVAEKFATVTATTPKQDLFSAEAVKITKKKQFCLHECIGKKNNLLTEDGSLNKTFIADYAMKSVFKEQWQKQVGQKALDKCLEETYIPWPAEDKENVCNPVYVQFQHCLWLQYESNCPANKIKITKKCEKTRNRYRMQKSTSN
		ApisOBP6		MPNILPNLDSTWEKCFETFKQFKDKPETKEYKEMAHGKEPPCLFQCIFMQSGLTTSDGKLNEDAITKKMSEGINNDEKWKSIWQNSLNKCFDDVKQEDKKQILIMNTPAGRLMKCFLRDMYMSCPKNVWVESSECLNMKDLVQKCPEMPPPVFKSPPKLI
		ApisOBP7		MVARKRMYNMLPTTVLFAIIAATVLKDCDAYLSEAAIKKTQQMLKTVCSKKHSVEEDVFTNIKKGIFPEDNNNIKCYFACNFKTMQLINQKGVIDKKMFKDKMSMMAPPNVYKILLPVIEQCTGKDKGEELCQSSYNVIKCAHSVDPKSLEFLPL
		ApisOBP8		MFALKVACLCLSVAVVFGENNQQNGPSDRSATIFQSCIAETKLSGDALKGFRSMSIPKTQAEKCMMGCLMRKVNVINKGKFSVEEATKVAQKYYGTNEAMMKKAKDLIDVCAKKAQSTTEECALAGIVTTCIVEEAQKAGLSGGPGSRSRRTVSPKFRRDAM
		ApisOBP9		MIIKKTLLLSVFVLFGCLFSINKADDADAKDKELMSKLFTVVFKCFKDADWGTCGEMITTKYDITQAKYKQCTCHMACAGEELGMINASGQPEPAKFLEYVNKINNPDIKSQLQLIYDKCQNVKGSEKCDLAEQFAICAFKESPALKERVSTLMEMLVKMKPKSK
		ApisOBP10		MEHLRSTNVVFAIVMALLVVQSSTRPQPDEMEEIKRTLYNACAGKFPITEEIKNNAKNSIISDDPTFKCFLKCCFDEMSMIDEDGIIDGDSLKAMAPDHIKPILEQVIPSCTKNVKQDGCEASFEFISCGIKLNPLIVALLPL
		ApisOBP11		MSSSTFYITLLFGIAMLISCGYGIFTTEQIDYYGKACNASEDDLIVLKSYKVPSTETGKCLMKCMITKLGLLNDDGSYNKTGMEAGLKKYWSEWATEKIETINEKCYEEGNTATLLYHVAIYFTCVSGDYSDVQLLIHCDGMFEQEVGSRQVNLKLLIMLKIGLSEPKR

## Sheet: Table S2 
Table S2 CSPs Sequence used to construct the phylogenetic tree
Species		Gene		Sequences
Nephotettix cincticeps		NcinCSP1		MRSTTLVLLAAVVTTAAAANTYTNKFDSIDVDRILANDRILTQYIKCLMDEGSCTNEGRELKKTLPDALRTGCSKCTDKQKAATDKVIKHVRKNKARDWERLVNKYDPKGEFRSKYEGRLDKP
		NcinCSP2		HRVSMKMLVIVVLAVLAAATADDDKYSTKFDDVDVDQILKNERLVKSYFNCLVEKGPCSPEGKELKKNVPDALENDCAKCSDKQRINADKILSYLFQHKQDSMFEELEAKYDTEHKYRARIEKKLAAGEAKQ
		NcinCSP3		MSSATTLTFCAAALLCSCVVSTHAQQRGYTNKYDNMDVDKVLNSKRLVSNYVQCLVDKKPCPPEGQELKKNIPDAIKTKCAKCSEVQKEKAIIVIRKMQKDYPQEWKILTDKWDPTGNLMREFEREYAKMTAQKKQG
		NcinCSP4		MAKFSVSLLCVVCVTAAVAAPQDKYTTKYDNVNVDQVLRNNRLLNNYIRCLLDQSGCSPEAEELKKNIRDALESGCKKCSQKQKEGTEKVFRFLIKNKPKEFEALEKKYDPKGTYRARYEGEANKKGIKV
		NcinCSP5		MHVLLLLSVVVAVALAVPQQKYTTKYDNVDVDNILKNDRLLAKAVSCLMDEGTCTPDMAELRKVLPDALKTECSKCSEKQKEGAKKVLKHIYENKPEIFNKLEKKYDPEGEYRKKYKSVAEKEGYKV
		NcinCSP6		MLLPLVLIPLVGVYAQRTPDPAKRALHRLEKIDVDTMLNNDRIMTNYVKCFVNKGPCAPEARDFRKLIPKLASTACGDCTPNQKRIIKKVFLYIYTQRNNDWKVLQEAFDPKHKFEDKICSFMGLEKTKT
		NcinCSP7		MKAVFAIVVLAVAAEAAVAASADTYAATWDNIDLDEVLSNDRLLKVYVDCLLGRGKCTPDGAALKRVLPEALMTHCAKCTEKQKHGGLKVIKFMMEKKPEMWKDIAAKYDPTGAYSKNI
		NcinCSP8		LHQVKMRVSAVILTVTWVACVFANEGYNINYGNINIDELLSRPRAMIAYLNCLRGVGPCTPEGRESKKYFPEVLKSNCAKCSEEQINITKKMVKAFYTKFRDDWTKLMDKYDPKHELEESFIKWANEEK
		NcinCSP9		MHLVLVLALACAALAAPGPRPAGPQLNSRLDSVDVDKILDNPRVLSNYVKCVTDKGPCTAEGKELKKVLPEVLATSCANCSPKMKANLKKTIIAMRQKYPNEWNAVVAKYDPKKTHAKDLEAFLKA
		NcinCSP10		MLALLGVFCLVTLATMAEEKYTSRWDSLDVDNVLKNERLLRTYFRCVMDQGKCSPDAAEIKKNMREAMTSQCAKCTEKQRESVDKVMRFLYEKRQDMFSQLEKKYDPEGTSRKRFKDGADIETSGKETKVVSVMITPVAVIAESVNRVNVENTTDYEKPADIDNMTESVKTADGENTTESDNSQDEESTIIEPVKKTGEENTDGYDNAEGEENTTAYRAKDRENTTGSDNTTEEENINESDNTTQGGENTNESMKTVENKKEEENIT
		NcinCSP11		MTASAKVTLLVLAACVVAALAARTEVSDEAIDMALKDKRYFDRQLKCALGEGVCDPVGRRLKTFAPLVLRGACPQCTPKETEQIKRVLSHIQRHYPKEWAKFIKQYSSS
		NcinCSP12		RRSWLGVGMRCSVFLIFSAWVLVASGKQQSDSFSVDSVLNNPRVLNAYLKCVLGTGPCTKEGRELKRLLPEVLKTACKSCTQSNKENLRKFLRRVEADPKLSDAWRKVLEKYDPHRQYRGDLEKFVNTDYD
		NcinCSP13		MGARPLLAVGNMITSGLAAMLLLAGSVALTSPRYTTRFDSINVEAVLKNERILRRYVDCALDRGPCTAEGRELKRRLPDALKSDCAKCSEVQRKQARRVIDFLTQHKHAYWVQLAAKYDPAGEYRRRHHINE
Empoasca onukii		EonuCSP1		MSNFQLTMFSQRALFAGLLFFLWVIFVFAEDIKLYSDKYDHVSIDEILANDRKRNQYLDCYLEKAPCRTPDAKFFRETFPEALVTKCKFCTERQKDFFAKITEYYLEKEPDTWDIVVRKTITDYSKNPKQ
		EonuCSP2		MQVSTVVLLALAACAAAQLGYQSKYPGVDIDSILSNQRVLKSYINCFLEKGPCTPQGREGKKFFPEIYNTNCGKCSDDQKEMVKKVVKAFYSKRKEDWGKIVDKFDPDHKKEKEFLNWAQSS
		EonuCSP3		MKLAVCFVAVTMAVGVLSADTATYSTAWDNIDLDKVLANDRLISAYTNCLLDKGSCSPEGSALKKVLPEALQTSCAKCTQKQKDKGKKVVRFMMDNKPELWKEIAAKYDPDGTYTNKFKMNEQ
		EonuCSP4		MKVAVCFVVVSMAVGVLSADSSTYSTAWDNIDLEKVLANDRLISAYVNCLLDRGSCSPEGTALKKVLPEALKTSCAKCTQKQKEKGRQVVKFMMDNKQDLWKEIAAKYDPDGTYTSKFKKGKQ
		EonuCSP5		MTSTTLCVLCGLLVAVAVQGATTGGYNTRLDSVDVDKILANPRVLSNYVKCIVDKGPCTSEGKEIKKFLPEVLSTSCAKCTERQKTNVKKTIRAMRERYPKEWEAVVNKYDPKKSRAKDLEAFLAA
		EonuCSP6		MSTCTLVLTVLAVLGAVLGDESYTSRWDNVNVDPILKNERLLKTYLKCVLDQGSCSPDAAELKKNIPDALENECSKCTEKQRENVEKVMRHIYNKKPDMFNQLEKKYDPRGVYRAKYTAKYPEEAKREGVKV
		EonuCSP7		MMNTLCVLTVLLALGSALQLNVSPELADQYLQDKVFTMQQLKCVVGTGFCDVIGNMIKADAVEVLTNNCAKCTASERYTSDRVWSHVRQYYPAYYNTIYNMYVRRG
		EonuCSP8		MKWWVLLCVLLQWERTGAQVRPDPARRSLHRLEKIDVNTMLGNSRIMTNYIKCFMGKGPCSPEARDFRKLIPKLTKTACGDCTPNQKRVIKKIFLFIYNERNSDWQLLQQLFDPKRKFETRICDFMGVTPTAPSNTTLTAELKVKPDKATKMDKKKPS
		EonuCSP9		MRTSTALVFAGLLAMATAAMYTNKFDSIDVDKILNNDRILQQYIRCLMGEGSCTNEGRELKKTLPDALKTGCSQCTEKQKAATDKVIRHLRKNKSRDWERLVNKYDPSGEFRSKYESRLDA
		EonuCSP10		MQVCAVLLALSACAAAQLGGYQSKYQGVDIDSILSNQRVLKSYVNCFLDKGPCTPQGREGKKFFPEIYDTNCAKCSDEQSEMVKKVVKAFSSKRKEDWEKIVDKFDPDHKKDKEFLKWAQS
		EonuCSP11		MQATVAAVLACAVAVTSVAAQGYQTRYPGVDVDAILSNQRVLKSYINCFLDKGPCTPQGREGKKFFPDIYETNCAKCSDEQKDLVRKTVKAFTSKRKEDWDKIVDKFDPDHKKEKEFLKWVEQK
		EonuCSP12		MSPRPTQVLFVVVLLACLVTADDKYTTKFDGIDVEAVLKNERILRRYVDCVLDKGPCTAEGRELKKRIPDAVQSECSKCSEVQKRQARRVLEFLIQKKPHYWEQLAKKYDPDGNLRKRHGVKV
		EonuCSP13		MYVALVLMMVAVAVAQDKYTTKYDGVNIDQILQNDRLLTSYFNCIMDKGKCSPDGQELKKHIPDALENECAKCSDKQKAGVEKVLRFLYEKKPDLFKEMEAKYDSEGKYRLKYKDRAEREFGIKV
		EonuCSP14		MAASTLVMFCICVAAATLTAAAPQAPVYTTKYDNLDVDKILASRRLVNNYVQCLTDKKPCSPEGAELKKILPDAIRTRCEKCNDVQKEKALKVVRKLQKDYPAEWKIVTSKWDPDGSLMKEFEKEYEKRGGKL
		EonuCSP15		MECTFMLLVLALLAAASAQQQYTTKFDGVDVDNILRNDRLLTSYFNCVMEVGKCSPDGTELKKRIPEALENECAKCTEKQKEGAQKVLKHLYEKKPDMFQQLEAKYDSSGKYRAKYKDRAEKELGTKIA
		EonuCSP16		MKAVAVFLVGLAQFCTAEGQKVGKGADIKGLLENRYFMKQQLSCVVKSGPCNFIGLQMQGAVTEVVSRNCQNCNPQQRATANQVMTFIRNNYPDYYRQIIARYSPQGG
		EonuCSP17		MMSLRVLLLAALCAAVLAKAEDKQYTTKFDNVNVDDLLRNDRLLKRAFGCLMDEGGCTPDVQELKKVLPDALQNECSKCSEKQREGAKKVLKFLWENKRAEFDKLEKKYDPEGVYRKQYKELAEKEGVKVE
		EonuCSP18		MMKSTLYILACLLAASSGTQQKQNLDPSPAQADMFLQDREFMTHQLNCVVGSGSCDAIGNVLKDAVVEVLSNNCAKCTAKQQNTSNHVLSYVRQHYPTYYTTIQNMYAKPLPTRGG
		EonuCSP25		MHLRLSILLVTLALMAASTKAAERMSQVSDEALDMALHDKRYLTRQLKCATGEGPCDPVGRRLKTLAPLVLRGACPKCTEAETKQIQKVLSHVQRNYPKEWSKLINQFTTGS
		EonuCSP26		MRSEMRVVLVTCVMLSVTHAYYVRYLNVTAATLLTNRRLLQCYVRCFVDEGPCPPQAREIKRLLPDLMASSCSKCDIRLRQVFERCRELMKYNYPKKWSKMFTTNTIPNSL
		EonuCSP27		MSRLCTVLCLCLTSVLSLPAPAPAPAQPGRQDNFSVDAVLNNPRVLNAYLKCVLGTGPCTKEGRELKRLLPDVLKTACKACPQQDKENLRKFLRRVRVDPKLSDAWRKVMEKYDPHRKYQAGLEKFVNEG
		EonuCSP28		MALLSVLNCLLGLLSLGLTRAPPQDSTSNPTLQDLDKDLDRLMEDEKLFNEYYLCLLNMGPCTRDTSNFREVIQEALEHECARCTDDQRSDVIQLLRTVMECRPREYAEIERQFDPSGKFKDKYKISLLAKRMAFIPVRPQEEEETCTWK
Bemisia tabaci		BtabCSP1		ADTYTTQFDNIDLEAILKNEKLVDNYTKCLMDEGPCTNEGRTLKKLLPDALKTACAKCTEKQKTGARKVIKFYQTQHPEDFKKLQQKYDPEGKFKAEFEKALFGQTL
		BtabCSP2		APAEDKYTDKYDNINVDDILGSKRLLKSYLTCLLDKSPCTPEGSELKRLLPDALKTACSKCTEKQKEGAARIVERVTAEYPTEWKELSAKWDPTGEYWAKYKPLVQEYLKASA
		BtabCSP3		AAATKESTKESTYTNKYDNIDLGKILTNDRLFLNYFKCLMDEHTCSPDGAELKKVLPDALSNKCAKCTERQRSGSEKVIRHLIDNKPEMWAKLEAKYDPKGTYRKTYKNEAEKLGIKV
		BtabCSP4		APAPLEQSDLEKFENMDLSSILSNKRLRTAYVNCMVDKGPCTADAAEFKKILPDLTETQCADCSAKFKELIKKSVSTFQKDYPEDWKTLMAHFDPDNKRAADLEKFMSS
		BtabCSP5		DDFYSDKYDNIDLDSILASKRLIRNYMNCFQGKSPCTPEGTYLNQVLPEALKTECAKCTEKQREGAVKAIKKLSAEYPEEWKEITDKLDPTGEQYAKFKARFP
		BtabCSP6		MVCSESIVRCLTYFQVISLVYRLASAQSNNRATYTTKYDYINVDAVMKNERILKMLVECMLERGRCTREGLELKAAVPDALATDCAKCSQMQRKHASRVIAYLITYKKEYWNALATKYDPDGSYRRKYGIPPQPQELSAGAAIQPSPNLIKPTKTVKKTVTTVNNTNNLFKAKKRMTREEKKEMVRRRFPQLHFMPNMWASNIQKIEKKSERAPSIARRNVRRKAHTPTRRHSTQRTAPKRGQETG
		BtabCSP7		MPAPQTTRATISDEALESALNDKRYLMRQLKCALGEGVCDPVGRRLKTFAPLVLRGACPQCSPTETRQIQKVLSHIQRHHPKEWSKIVKQFTS
		BtabCSP8		ASTYTTKYDNIDLDEILNNDRIYKKYYDCLANKGKCTPDGKELKDILPDALKTGCSKCNEKQKKGSEKVIKFLLDKKKADYDVLEKIYDSNGVYRQKYADEAKKR
		BtabCSP9		APAEFYTSQFDNIDIESILKNEKLLDNYFNCLMDEGPCTLEGRTLKSLLPDALNTSCAKCTEKQKKIARRVMTFYLDKYPANSARIIKKYDPENKFKDGIEKALLGSR
		BtabCSP10		APAETYTTEFDGIDIDSVLKNEKLLDAYAKCLLDEGPCTREGRTLKTLLPDALETTCAKCSPTQKEKAKKVITFYMEKYPENAQKIMKKYDPTGKYRKALEEAFLGSL
		BtabCSP11		AISDDEYRLETLCSSPALEHFDITPILKNDRLVSSYFKCFMDEGPCTNEGKMVKRIIPEIMRTQCRNCNPTMRRIVRTVMKHMFQTRPRDVDDFFLKYDPHEMYYDDLIEFMDEDNDY
		BtabCSP12		LPQKGPASTPRKQSVEEALGKKPEELPKTMKEALKRMEAVDVEKVLNNDRILTNYLKCFLNKGPCTSEAKNVKKSIALLVESRCVECDPKQRKIIKKSMQVVKTKKPREYQELIKLYDPKGTQIAELEKFFASSK
		BtabCSP13		APPAGVDEKLLSKYDNFDVDRVLNNDRVLANYIKCLMDEGSCTNEGRDLKKSIPDVLAGGCDKCTEKQKSVTEKVIKHLINKRPKDWDRLSKKYDPQGQYKNKYADLYEKVQKEAAKESKEPSKPTKDTKETTKVTKDTKESAKAPKA
Nilaparvata lugens		NlugCSP1		MFKNVLLVCLLVAVVSAKPKPAEKKQYTTKYDNIDLDEILNNQRLFDNYYKCLLGGKCTPDGQELREALPDALATACSKCTEKQRVGTEKVIKYLIEKKPTEYSELEKKYDPQGNYKRKYQAEAAKRGIKV
		NlugCSP2		MSKLPVTLVLMLAVFSVDCGKLYKDRYTTKFDKIDLDEALNNQRLFESYLKCLMGDKCSPDGYELREALPDALATACAKCSEAQKAGTEKVIRFLIEKRPKEYALLEKKYDPEGIYRDKYKPIAEMKGIKLD
		NlugCSP3		MKFLCVTIFECALIVVAFGMPQDTTYPTTYDDVNVDDILHNDRLFNRYFTCLTKKEGCTPEGKLLAATIPDALATTCAKCSAKQKTAAEKVIKYLYFNKRDKFDELAKIYDPESNYLNKYLVDGFPAKV
		NlugCSP4		MFLIAVWALSPRRLPWGLPWGGLAGVAAQQQAKNTRYTTRFDSIDVEVILKNERIFRRYMDCLLDKGRCTPEARELKRLLPEALKTECLKCSEVQRRQGAKVMAFIIKNKRPSWELLLAKYDPQGIFRAKYMYNENNIEAVLKQLEREQQGIYGTYSSTNSTTSSNSTSIR
		NlugCSP5		MRCLLLVAVVCAALVAVCHAQDSKYTSKYDNIDIDKILKNDRVLSQYIKCLMGEGSCTQEGRELKRLLPDAIQSNCSKCSEKQRSASVKVMRHLRQSRERDWNRLLDKYDPQGDKRKNLKLD
		NlugCSP6		MLWAARFIVLPLLFCVLQVWSAPADEKYTDIDFDSILANRRVLSSYVKCLTDKGPCTPQGKELKKIVPEVIQTSCTKCSPQQKKVVRNVITTMQSKYKDQWDLVVNKYDPKKQRSGELKAFLSGTD
		NlugCSP7		MASASSGTTSTTSAPKTAESASAKSSSKDEIPDQTFDRYINNERYMLMQYECLMGNKPCDHVGRKLKAAVPLVVRGLGCPKCSQREEDQMKRIVSHVQRSYPDKWQKLIKKYGN
		NlugCSP8		MSSTMLVFVAVLCFSAVLAKPADKYTTKYDNIDLDEVLSNQRLFDSYFKCLMGGKCTPDGQELRDALPDALATACEKCSEKQKEGTEKVMKFLIEKKPTEFAELEKKYDPQGTYRQKYKAEADKRGYSV
		NlugCSP9		MKSQQLLVSCLFICTWLVVLMAPSANAAPKEKDPERKALYRLEYIDIEKVLDNNRMLTNFIRCFLRQGPCTPEARDFRKLLPKLAKTMCSDCTARQRYIIKKVFKHLMEERPKEWELLMDRFDPQRKYAERLDTFMVDMTTRAPVTSSPMPSSPVTLTSSSVTMSSTTQRVIEILRTSTDMSNESRPAS
		NlugCSP10		MFMLLACSELGSGQQQQNVDNIEMSIYDKMFENMDVNSLLKNHRLVDSYLKCFLNEGSCTHIGHEVKMMIPEVIKSRCGTCGENQMRALKAGLRLFIVLRPDDWQRFLDVYDPDRKEWPHIKAFMDSDD
Sogatella furcifera		SfurCSP1		MFNLLTLVVCLSTIAVQIQAAPEEAQYTTKYDKINLDEILNNDRLFKSYFGCLMGGKCTPDGQTLRDILPDALETACSKCSDTQKAGTEKVFKFMIEKKPSEFADLEKKYDPNGKYRARYEADAEKFGIKV
		SfurCSP2		MVLADTPTTSPKVETKAVESGKSSSKDEIPDQTFDRYINNERYMLMQYECLMGNKPCDHVGRKLKAAVPLVVRGLGCPKCSQREEDQMKRIVSHVQRSYPDKWQKLIKKYGN
		SfurCSP3		MQLLYALVFGCTLVMVSSDMPQSTYPTKYDDYNPDDILKNDRLFNQYFICLTKKKGCTTAGELLSAIIPDALATSCAKCSAKQKAIGEKVIRFLYFNKPDEFAEMSKIYDPEGKYLEMYIASGGLI
		SfurCSP4		MKCPLLSVSCLWISLLALSSSASAATKEKDPERKALYRLEYIDIEKVLDNNRMLTNFIRCFLRKGPCSPEARDFRKLLPKLAKTMCSDCSPRQRFIIKKVFKHLMEERPKEWELLMDRFDPQRKYAERLDTFMVDMTTPSTTTTTTSTTPSTPMSSTTQRIIEILRTSTEMSNESSP
		SfurCSP5		MSEILVTSLIFMLLAASELGLGQQQQTQKPQQQNVDNIEMSIYDKMFENMDVNSLLKNHRLVDSYLKCFLNEGSCTHIGHEVKMMIPEVIRSRCATCGENQMRALKAGLRLFIVRRPDDWKRFLDVYDPDRTEWPHIKAFMESDD
		SfurCSP6		MKLALFCCLLGLVAAVSAQSEKSEKPEKYTTKYDYINVDEILSNDRLFNSYYKCLMGGKCTPGGPELRTHLPDALQTNCSKCSEKQKEFSDKVIKHLMDNKPEEFSALVKKYDPEGIYKDAFKPKHNQ
		SfurCSP7		MRASKASSLVAVLLIAVWGFTGVQAQQKSKDTRYTTRFDSIDVEVILKNERIFKRYMDCLLDKGRCTPEARELKRLLPEALKTECLKCSEVQRRQGAKVMGFIIKNKRPYWDLLLAKYDPQGIFRAKYNYNENNIEGVLKQLEREQQGLYGTYSNTTNTTNTVNSTSTRK
		SfurCSP8		MLKFTLTLLVLAVVSVNCGKLYKDRYTTKFDKIDLDEALNNQRLFESYLKCLMGDKCSPDGYELREALPDALATACAKCSDAQKAGTEKVIRFLIEKRPKEYALLEKEYDPEGIYRDKYKPIAQEKGIKI
		SfurCSP9		MRCLLLVAVVFAAFIAAARADEANKYTSKYDNIDIDKILKNDRVLSQYIKCLMGEGSCTQEGRELKRLLPDAIQSNCSKCSEKQRQASVKVMRHLRQSKERDWNRLLDKYDPQGDKRKNLKLD
Laodelphax striatella		LstrCSP1		MASVSSATLTAAALLALLALQLTAAQNFNEADIARMLNDSGLVQRQISCILGEAACDNIGNMLKLAIPEVLKRNCRSCNAQQASNARRLISFVQANYPAQWQRIQSRYVG
		LstrCSP2		MRCLLLVAVICAAFIAAAQADEANKYTSKYDNIDIDKILKNDRVLSQYIKCLMGEGSCTQEGRELKRLLPDAIQSNCSKCSEKQRQASVKVMRHLRQSRVRDWNRLLDKYDPQGDKRKNLKLD
		LstrCSP3		MKLALFCCLLGLVIAVSAEKYTTKYDHINVEEILNNERLFNSYYKCLMGGKCTPDGLELRTHLPDALRTNCSKCSEKQKEFSDKVIRYLIDNKPEEFAALTKKYDPEGIYKTTFGPQFKKDNTTTNQ
		LstrCSP4		MLWAAKFIVFPLIFCVLQVWSAPADEKYSDIDFESILANRRVLSSYVKCLTDKGPCTPQGKELKKIVPEVIQTSCTKCSPQQKKVVRNVITTMQSKYKDQWDLVVNKYDPKKQRAGELKAFLAGTD
		LstrCSP5		MLKFKLTLLVMASAFFSVDGGKLYKDRYTTKFDKIDLDEALNNQRLFESYLKCLMGDKCSPDGYELREALPDALATACAKCSEAQKAGTEKVIRFLIEKRPKEYALLEKKYDPEGVYRDKYKPIAEEKGIKI
		LstrCSP6		MQASSLAMLLIAVWVLSPRRPLSGGFAGVHAQQSKNTRYTTRFDSIDVEVILKNERIFKRYMDCLLDKGRCTPEARELKRLLPEALKTECLKCSEVQRRQGAKVMAFIIKNKRPYWDLLLAKYDPQGVFRAKYKYNDQNIEAVLKQLEREQQGLYGTYSNPTNTTTVNSASSRK
		LstrCSP7		MIQRTQGFNSIVVLLLIKLTVLSMVLASTHAPAPTPTPKVETKATEAAKSSSKDEIPDQTFDRYINNERYMLQQYECLMGNKPCDHVGRKLKAAVPLVVRGLGCPKCSPREEEQMKRIVSHVQRSYPDKWQKLIRKYGQ
		LstrCSP8		MKSPCLLSVSCCILVLVASSASAAPKEKDPERKALYRLEYIDIEKVLDNNRMLTNFIRCFLRKGPCSPEARDFRKLLPKLAKTMCSDCSPRQRFIIKKVFKHLMEERPKEWELLMDRFDPQRKYAERLDTFMVDMTTRATPTTTTTTIPTTTTPMSSTTQRIIEILRTSTEMSNESRP
		LstrCSP9		MSEVLVMILIFMLLAGREQRLQQQQQQQQQPQPQQQNVDNIEMSIYDKMFENMDVNSLLKNHRLVDSYLKCFLNEGSCTHIGHEVKMMIPEVIRSKCATCGENQMRALKAGLRLFIALRPDDWKRFLDVYDPDRTEWPHIKAFMEYDD
		LstrCSP10		MYDHINVYNILKNERLFNRYFTCLTKKEGCTPEGKLLAAAILDALETSCANCSNEQRKLAEQVIQYLYFNKRDKFDELAMIYDLEGVFQEYHIAEYLVSGSWMPDFRKLPPV
		LstrCSP11		MKFLYFTVFGCALVMFTSAIPEIIFTSAMPQKTYSTMYDHINVNNILKNDRLFNRYFTCLTKRGGCTPEGKLLAAAILDALETSCANCSNEQRKLARQVIQYL
		LstrCSP12		MFKNLLVVCLLVAAVSAKPKPAEKKNTTKYDNIDLDEILNNQRLFDNYYKCLLGAKCTPDGQELKEALPDALATACSKCTEKQRVGTEKVIRHLIEKKPTEYAELEKKYDPQGTYKRKYQAEAIKRGIKV
Apolygus lucorum		AlucCSP1		MLKVLVLLAAVVCCVSAAATYTSKYDNIDLDEILSNTRLYKKYFDCLANKGKCTPDGKELKESLPDALKTNCAKCTKKQQEGTDKVLRHVLKNKPNDYKVLESIYDPTGIYRKKYEIEAEKRGIKLPGSH
		AlucCSP2		MASKLSVVLLIGAVGMVLAADKYTDKYDNIDLDEILGNQRLYQKYFDCIQGKGKCTPDGAELKETIPEALKTECAKCSDKQKAGVEKVLRHLIREKPDDYKVLEDQFDPEGVYRKKYEDLKKKVEEGKPIEY
		AlucCSP3		MKVAVLVLLCVGAALSAEVYTSKYDNIDVDKILSNDRILTQYIKCLMEEGNCTNEGKELKKTLPDALASGCTKCSEKQKAQTEKVLRHLSKNRPRDWNRLKNKYDPKGEYSKKYEKEAKAISA
		AlucCSP4		MKFVAALFVASVAVLAVEAADQYTTKYDNIDLDDILKNQRLYKKYFECLTNKGKCTPDGKELKEHLPDALKTGCSKCSEKQRAGSEKVIKHLLKNKPSDYAILEKIYDPQGSYKKKYEAEAKKLGINV
		AlucCSP5		MVGKLSVVLLIGAVGMVLAAELYTDKYDNIDVDEILGNQRLYQKYFDCIQGKGKCTPDGAELKKNIPEALQTDCAKCSEKQKAGVEKVLRHLINEKPEDYKVLEEQFDPEGVYRKKYEHLKKKVEEGKPV
		AlucCSP6		MVSKLSIVLLIGALADVWASELYTDKYDNIDVDEILGNQRLYQKYFDCIQGKGKCTPDGAELKKNIPEALQTDCAKCSEKQKAGVEKVLRHLINEKPEDYKVLEEQFDPEGVYRKKYEHLKKKVEEGKPIEY
		AlucCSP7		MVSKLSIVLLLGALADVWAAELYTDKYDNIDIDEILNNDRMYKNYFNCVMGNGKCTPDGLELKAKIPEALQTECAKCSDKQKKGAEKVLRFIINQKKDDYKLLEEKFDPEGVYRKKYEAQKKLAEEGKPIEY
		AlucCSP8		MLKVLVLLANAASTYTTKYDNIDLDEILSNQRLYKKYYDCLANKGKCTPDGKELKEALPDALKTNCSKCSKKQQEGTDKVLRYVLKNKPNDYKVLENIYDPSGNYRKRYEDEASKRGIKLPGSH
Adelphocoris lineolatus		AlinCSP1		MLKVLVLLAAVVCCVSAAATYTSKYDNIDLDEILSNTRLYKKYFDCLANKGKCTPDGKELKESLPDALKTNCAKCTKKQQEGTDKVFRHVLKNKPNDYKVLESIYDPPGIYRKKYEAEAEKRGIKLPGSH
		AlinCSP2		MKVAVLVLLCVGAALSAEVYTSKYDNIDVDKILSNDRILTRYIKCLMEEGNCTNEGKELKKTLPDALASGCTKCSEKQKAQTEKVLRHLSKNRPRDWALLKTKYDPKGEYSKKYEKEAKALTA
		AlinCSP3		MISKLSMVLLIGAFADVWAAEQYTDKYDNIDIDEILNNDRMYKNYFHCVMGNGKCTPDGLELKAKIPEALQTECAKCTDKQKKEVEKVLRFIINQKKDDYKLLEEKFDPEGVYRKKYEAQKKLVEEGKPIEY
		AlinCSP4		MRIILSAFLVAMACSLATCEMTEEEFYTKVFEEVDPDFILDNERILTSYLKCFYNEIECNAHAEVVKKSIPDVLATVCGRCSDKQKSIFKYSLNKFIPAHPKDWEKILSIYDPSGEAWPKVKAFIES
		AlinCSP5		MGHLTIVLLAAAFEVLTGSRAYTTHYDYIDVDQVLNNTRLYTKYVECLLGQGKCTPEARELRDKLPEALQTNCARCSERQASESHRVIRFLIQNRQEDFKLLEAKYDPSGLYFKRFEEETKRNVSLS
		AlinCSP6		MFYKLSVVVLMGILAGVWAADKYTDKYDNIDIDEILTNERLYKKYFDCIQGTGKCTPDGIELKEKIPEALKTECAKCNEKQKAGVEKVMRYLITKKPEDFKILEDKFDPEGVYRKKYEAQRKLVEEGKPVEY
		AlinCSP7		MNYKLSVILLIGVLASVWAASTYTDKYDNIDLDEILTNERLYKKYFDCIQGKGKCTPDGTELKEAIPDALKTECAKCNAKQKAGVEKVLRHLLTKKAEDYKILEDKFDPEGVYRKKYEAQKKLADEGKPIVL
		AlinCSP8		MDYKLSVMLLMGVLACAWAADKYTDKYDNIDIDEILNNERLYKKYFDCILGNGKCTPDGTELKETIPDALKTACAKCNDKQKAGVEKVLRHLLTKKAEDYKILEAKFDPEGVYRKKYEAQKKLAEEGKPIAL
Aphis gossypii		AgosCSP1		MNILTIFCYVTVMCDTQVKPAVSAQRLQSVNQNVTPTNDGRKTIRETSSYPTRYDYIDIEAVMNNERIIKILFNCVMSRGPCTREGLELKRIVPDAIQTECAKCNERQRKQAGKVLAHLLQYKPEYWKMLVQKFDPNNVYLRKYMADNDDDEKLSLQKLSNDTTKKKRNI
		AgosCSP2		MAHLNLFVVLIASLIYFTSAAEEKYTTKFDNFDVDKVLNNNRILTSYIKCLLDEGNCTNEGRELKRVLPDALKTDCSKCTDVQKDRSEKVIKFLIKNRSTDFDRLTAKYDPTGEYKKNLEKFEKERASAKPLKA
		AgosCSP4		MDSRIAVVCVVLAAFAVDQTVGAPQKDAVAASGPAYTTKYDHIDVDQVLASKRLVNSYVQCLLDKKPCTPEGAELRKILPDALKTQCAKCNATQKNAALKVVDRLQKDYDAEWKQLLDKWDPKREHFQKFQQFLAEEKKKGFTKF
		AgosCSP5		MHCKVLIALCCVAVYAVQASPAGTATAAAVSADDEIKDFPAYMKRFDKLNVEQVLNNDRVLASHLKCFLNEGPCVQQSRDLKRVIPVIANNGCNGCTERQMTTIKKSLNFLRTKKPTEWARLVKIYDPSGTKLNKFLDA
		AgosCSP6		MIKLILAIAFCVSITMTVVQTAPAKYTTKYDNVNIDEILNNDRLVASYFKCLMETGKCTPEGEEIKRWLPEAIENKCEDCSEKQKLGSEKIIKFLFEKKNDMWKQLEAKYDPQGTYRQRYAEEAKKLNINV
		AgosCSP7		MSRSSSSVTMKVFVIAICVCAALARPEDVKVENKPAVIKSETLAAPLPTNIVKRATDTIQLDSSLPNVSEDVLDKALSDRRFVQRQLKCATGEGPCDPIGRKIKAHAPLVLRGMCVKCSQSEIKQIQRVMSHIQKNYPKEYTKMLKQYQSGF
		AgosCSP8		MNNIIMNNSRGRYGIFSLLAVTIAAIMLVHQPATVRCADGGIITPQQQQQQTMMFTAPTGYYVSTYDHIDVGRLLRNNKVVSGYVKCFVNEGPCTPDGKLVKAYLLPEIIRTVCGKCTPRQKDMARMVLKHIYTYRQADFEKIMQIYDTDGKRNEILAFMNH
		AgosCSP10		MINTRPRKLVRCIRGVSISVAKGDDAVNAENKDDDSHLVNREEIQRYMSMMEKINIDQMLNNTRLMSNNVKCFLNEGPCTAHLREMKKMVPMLVKDSCSSCTKEQKIMMKKAMDAVKARRPNDYEKLSKFFDPEGKYEKKFLENLNESK
