# Supplementary material for: Identification and Expression Analysis of Odorant-Binding and Chemosensory Protein Genes in Virus Vector Nephotettix cincticeps
Source: Insects. 2022 Nov 5;13(11):1024. doi: 10.3390/insects13111024 (PMC9698027; doi:10.3390/insects13111024)
Supplement: Supplementary file 1 [file insects-13-01024-s001.zip › Table S2 CSP sequences used to construct the phylogenetic tree.xlsx]

## Sheet: Sheet1
Table S2 CSP sequences used to construct the phylogenetic tree
Species		Gene		Sequences
Nephotettix cincticeps		NcinCSP1		MRSTTLVLLAAVVTTAAAANTYTNKFDSIDVDRILANDRILTQYIKCLMDEGSCTNEGRELKKTLPDALRTGCSKCTDKQKAATDKVIKHVRKNKARDWERLVNKYDPKGEFRSKYEGRLDKP
		NcinCSP2		HRVSMKMLVIVVLAVLAAATADDDKYSTKFDDVDVDQILKNERLVKSYFNCLVEKGPCSPEGKELKKNVPDALENDCAKCSDKQRINADKILSYLFQHKQDSMFEELEAKYDTEHKYRARIEKKLAAGEAKQ
		NcinCSP3		MSSATTLTFCAAALLCSCVVSTHAQQRGYTNKYDNMDVDKVLNSKRLVSNYVQCLVDKKPCPPEGQELKKNIPDAIKTKCAKCSEVQKEKAIIVIRKMQKDYPQEWKILTDKWDPTGNLMREFEREYAKMTAQKKQG
		NcinCSP4		MAKFSVSLLCVVCVTAAVAAPQDKYTTKYDNVNVDQVLRNNRLLNNYIRCLLDQSGCSPEAEELKKNIRDALESGCKKCSQKQKEGTEKVFRFLIKNKPKEFEALEKKYDPKGTYRARYEGEANKKGIKV
		NcinCSP5		MHVLLLLSVVVAVALAVPQQKYTTKYDNVDVDNILKNDRLLAKAVSCLMDEGTCTPDMAELRKVLPDALKTECSKCSEKQKEGAKKVLKHIYENKPEIFNKLEKKYDPEGEYRKKYKSVAEKEGYKV
		NcinCSP6		MLLPLVLIPLVGVYAQRTPDPAKRALHRLEKIDVDTMLNNDRIMTNYVKCFVNKGPCAPEARDFRKLIPKLASTACGDCTPNQKRIIKKVFLYIYTQRNNDWKVLQEAFDPKHKFEDKICSFMGLEKTKT
		NcinCSP7		MKAVFAIVVLAVAAEAAVAASADTYAATWDNIDLDEVLSNDRLLKVYVDCLLGRGKCTPDGAALKRVLPEALMTHCAKCTEKQKHGGLKVIKFMMEKKPEMWKDIAAKYDPTGAYSKNI
		NcinCSP8		LHQVKMRVSAVILTVTWVACVFANEGYNINYGNINIDELLSRPRAMIAYLNCLRGVGPCTPEGRESKKYFPEVLKSNCAKCSEEQINITKKMVKAFYTKFRDDWTKLMDKYDPKHELEESFIKWANEEK
		NcinCSP9		MHLVLVLALACAALAAPGPRPAGPQLNSRLDSVDVDKILDNPRVLSNYVKCVTDKGPCTAEGKELKKVLPEVLATSCANCSPKMKANLKKTIIAMRQKYPNEWNAVVAKYDPKKTHAKDLEAFLKA
		NcinCSP10		MLALLGVFCLVTLATMAEEKYTSRWDSLDVDNVLKNERLLRTYFRCVMDQGKCSPDAAEIKKNMREAMTSQCAKCTEKQRESVDKVMRFLYEKRQDMFSQLEKKYDPEGTSRKRFKDGADIETSGKETKVVSVMITPVAVIAESVNRVNVENTTDYEKPADIDNMTESVKTADGENTTESDNSQDEESTIIEPVKKTGEENTDGYDNAEGEENTTAYRAKDRENTTGSDNTTEEENINESDNTTQGGENTNESMKTVENKKEEENIT
		NcinCSP11		MTASAKVTLLVLAACVVAALAARTEVSDEAIDMALKDKRYFDRQLKCALGEGVCDPVGRRLKTFAPLVLRGACPQCTPKETEQIKRVLSHIQRHYPKEWAKFIKQYSSS
		NcinCSP12		RRSWLGVGMRCSVFLIFSAWVLVASGKQQSDSFSVDSVLNNPRVLNAYLKCVLGTGPCTKEGRELKRLLPEVLKTACKSCTQSNKENLRKFLRRVEADPKLSDAWRKVLEKYDPHRQYRGDLEKFVNTDYD
		NcinCSP13		MGARPLLAVGNMITSGLAAMLLLAGSVALTSPRYTTRFDSINVEAVLKNERILRRYVDCALDRGPCTAEGRELKRRLPDALKSDCAKCSEVQRKQARRVIDFLTQHKHAYWVQLAAKYDPAGEYRRRHHINE
Empoasca onukii		EonuCSP1		MSNFQLTMFSQRALFAGLLFFLWVIFVFAEDIKLYSDKYDHVSIDEILANDRKRNQYLDCYLEKAPCRTPDAKFFRETFPEALVTKCKFCTERQKDFFAKITEYYLEKEPDTWDIVVRKTITDYSKNPKQ
		EonuCSP2		MQVSTVVLLALAACAAAQLGYQSKYPGVDIDSILSNQRVLKSYINCFLEKGPCTPQGREGKKFFPEIYNTNCGKCSDDQKEMVKKVVKAFYSKRKEDWGKIVDKFDPDHKKEKEFLNWAQSS
		EonuCSP3		MKLAVCFVAVTMAVGVLSADTATYSTAWDNIDLDKVLANDRLISAYTNCLLDKGSCSPEGSALKKVLPEALQTSCAKCTQKQKDKGKKVVRFMMDNKPELWKEIAAKYDPDGTYTNKFKMNEQ
		EonuCSP4		MKVAVCFVVVSMAVGVLSADSSTYSTAWDNIDLEKVLANDRLISAYVNCLLDRGSCSPEGTALKKVLPEALKTSCAKCTQKQKEKGRQVVKFMMDNKQDLWKEIAAKYDPDGTYTSKFKKGKQ
		EonuCSP5		MTSTTLCVLCGLLVAVAVQGATTGGYNTRLDSVDVDKILANPRVLSNYVKCIVDKGPCTSEGKEIKKFLPEVLSTSCAKCTERQKTNVKKTIRAMRERYPKEWEAVVNKYDPKKSRAKDLEAFLAA
		EonuCSP6		MSTCTLVLTVLAVLGAVLGDESYTSRWDNVNVDPILKNERLLKTYLKCVLDQGSCSPDAAELKKNIPDALENECSKCTEKQRENVEKVMRHIYNKKPDMFNQLEKKYDPRGVYRAKYTAKYPEEAKREGVKV
		EonuCSP7		MMNTLCVLTVLLALGSALQLNVSPELADQYLQDKVFTMQQLKCVVGTGFCDVIGNMIKADAVEVLTNNCAKCTASERYTSDRVWSHVRQYYPAYYNTIYNMYVRRG
		EonuCSP8		MKWWVLLCVLLQWERTGAQVRPDPARRSLHRLEKIDVNTMLGNSRIMTNYIKCFMGKGPCSPEARDFRKLIPKLTKTACGDCTPNQKRVIKKIFLFIYNERNSDWQLLQQLFDPKRKFETRICDFMGVTPTAPSNTTLTAELKVKPDKATKMDKKKPS
		EonuCSP9		MRTSTALVFAGLLAMATAAMYTNKFDSIDVDKILNNDRILQQYIRCLMGEGSCTNEGRELKKTLPDALKTGCSQCTEKQKAATDKVIRHLRKNKSRDWERLVNKYDPSGEFRSKYESRLDA
		EonuCSP10		MQVCAVLLALSACAAAQLGGYQSKYQGVDIDSILSNQRVLKSYVNCFLDKGPCTPQGREGKKFFPEIYDTNCAKCSDEQSEMVKKVVKAFSSKRKEDWEKIVDKFDPDHKKDKEFLKWAQS
		EonuCSP11		MQATVAAVLACAVAVTSVAAQGYQTRYPGVDVDAILSNQRVLKSYINCFLDKGPCTPQGREGKKFFPDIYETNCAKCSDEQKDLVRKTVKAFTSKRKEDWDKIVDKFDPDHKKEKEFLKWVEQK
		EonuCSP12		MSPRPTQVLFVVVLLACLVTADDKYTTKFDGIDVEAVLKNERILRRYVDCVLDKGPCTAEGRELKKRIPDAVQSECSKCSEVQKRQARRVLEFLIQKKPHYWEQLAKKYDPDGNLRKRHGVKV
		EonuCSP13		MYVALVLMMVAVAVAQDKYTTKYDGVNIDQILQNDRLLTSYFNCIMDKGKCSPDGQELKKHIPDALENECAKCSDKQKAGVEKVLRFLYEKKPDLFKEMEAKYDSEGKYRLKYKDRAEREFGIKV
		EonuCSP14		MAASTLVMFCICVAAATLTAAAPQAPVYTTKYDNLDVDKILASRRLVNNYVQCLTDKKPCSPEGAELKKILPDAIRTRCEKCNDVQKEKALKVVRKLQKDYPAEWKIVTSKWDPDGSLMKEFEKEYEKRGGKL
		EonuCSP15		MECTFMLLVLALLAAASAQQQYTTKFDGVDVDNILRNDRLLTSYFNCVMEVGKCSPDGTELKKRIPEALENECAKCTEKQKEGAQKVLKHLYEKKPDMFQQLEAKYDSSGKYRAKYKDRAEKELGTKIA
		EonuCSP16		MKAVAVFLVGLAQFCTAEGQKVGKGADIKGLLENRYFMKQQLSCVVKSGPCNFIGLQMQGAVTEVVSRNCQNCNPQQRATANQVMTFIRNNYPDYYRQIIARYSPQGG
		EonuCSP17		MMSLRVLLLAALCAAVLAKAEDKQYTTKFDNVNVDDLLRNDRLLKRAFGCLMDEGGCTPDVQELKKVLPDALQNECSKCSEKQREGAKKVLKFLWENKRAEFDKLEKKYDPEGVYRKQYKELAEKEGVKVE
		EonuCSP18		MMKSTLYILACLLAASSGTQQKQNLDPSPAQADMFLQDREFMTHQLNCVVGSGSCDAIGNVLKDAVVEVLSNNCAKCTAKQQNTSNHVLSYVRQHYPTYYTTIQNMYAKPLPTRGG
		EonuCSP25		MHLRLSILLVTLALMAASTKAAERMSQVSDEALDMALHDKRYLTRQLKCATGEGPCDPVGRRLKTLAPLVLRGACPKCTEAETKQIQKVLSHVQRNYPKEWSKLINQFTTGS
		EonuCSP26		MRSEMRVVLVTCVMLSVTHAYYVRYLNVTAATLLTNRRLLQCYVRCFVDEGPCPPQAREIKRLLPDLMASSCSKCDIRLRQVFERCRELMKYNYPKKWSKMFTTNTIPNSL
		EonuCSP27		MSRLCTVLCLCLTSVLSLPAPAPAPAQPGRQDNFSVDAVLNNPRVLNAYLKCVLGTGPCTKEGRELKRLLPDVLKTACKACPQQDKENLRKFLRRVRVDPKLSDAWRKVMEKYDPHRKYQAGLEKFVNEG
		EonuCSP28		MALLSVLNCLLGLLSLGLTRAPPQDSTSNPTLQDLDKDLDRLMEDEKLFNEYYLCLLNMGPCTRDTSNFREVIQEALEHECARCTDDQRSDVIQLLRTVMECRPREYAEIERQFDPSGKFKDKYKISLLAKRMAFIPVRPQEEEETCTWK
Bemisia tabaci		BtabCSP1		ADTYTTQFDNIDLEAILKNEKLVDNYTKCLMDEGPCTNEGRTLKKLLPDALKTACAKCTEKQKTGARKVIKFYQTQHPEDFKKLQQKYDPEGKFKAEFEKALFGQTL
		BtabCSP2		APAEDKYTDKYDNINVDDILGSKRLLKSYLTCLLDKSPCTPEGSELKRLLPDALKTACSKCTEKQKEGAARIVERVTAEYPTEWKELSAKWDPTGEYWAKYKPLVQEYLKASA
		BtabCSP3		AAATKESTKESTYTNKYDNIDLGKILTNDRLFLNYFKCLMDEHTCSPDGAELKKVLPDALSNKCAKCTERQRSGSEKVIRHLIDNKPEMWAKLEAKYDPKGTYRKTYKNEAEKLGIKV
		BtabCSP4		APAPLEQSDLEKFENMDLSSILSNKRLRTAYVNCMVDKGPCTADAAEFKKILPDLTETQCADCSAKFKELIKKSVSTFQKDYPEDWKTLMAHFDPDNKRAADLEKFMSS
		BtabCSP5		DDFYSDKYDNIDLDSILASKRLIRNYMNCFQGKSPCTPEGTYLNQVLPEALKTECAKCTEKQREGAVKAIKKLSAEYPEEWKEITDKLDPTGEQYAKFKARFP
		BtabCSP6		MVCSESIVRCLTYFQVISLVYRLASAQSNNRATYTTKYDYINVDAVMKNERILKMLVECMLERGRCTREGLELKAAVPDALATDCAKCSQMQRKHASRVIAYLITYKKEYWNALATKYDPDGSYRRKYGIPPQPQELSAGAAIQPSPNLIKPTKTVKKTVTTVNNTNNLFKAKKRMTREEKKEMVRRRFPQLHFMPNMWASNIQKIEKKSERAPSIARRNVRRKAHTPTRRHSTQRTAPKRGQETG
		BtabCSP7		MPAPQTTRATISDEALESALNDKRYLMRQLKCALGEGVCDPVGRRLKTFAPLVLRGACPQCSPTETRQIQKVLSHIQRHHPKEWSKIVKQFTS
		BtabCSP8		ASTYTTKYDNIDLDEILNNDRIYKKYYDCLANKGKCTPDGKELKDILPDALKTGCSKCNEKQKKGSEKVIKFLLDKKKADYDVLEKIYDSNGVYRQKYADEAKKR
		BtabCSP9		APAEFYTSQFDNIDIESILKNEKLLDNYFNCLMDEGPCTLEGRTLKSLLPDALNTSCAKCTEKQKKIARRVMTFYLDKYPANSARIIKKYDPENKFKDGIEKALLGSR
		BtabCSP10		APAETYTTEFDGIDIDSVLKNEKLLDAYAKCLLDEGPCTREGRTLKTLLPDALETTCAKCSPTQKEKAKKVITFYMEKYPENAQKIMKKYDPTGKYRKALEEAFLGSL
		BtabCSP11		AISDDEYRLETLCSSPALEHFDITPILKNDRLVSSYFKCFMDEGPCTNEGKMVKRIIPEIMRTQCRNCNPTMRRIVRTVMKHMFQTRPRDVDDFFLKYDPHEMYYDDLIEFMDEDNDY
		BtabCSP12		LPQKGPASTPRKQSVEEALGKKPEELPKTMKEALKRMEAVDVEKVLNNDRILTNYLKCFLNKGPCTSEAKNVKKSIALLVESRCVECDPKQRKIIKKSMQVVKTKKPREYQELIKLYDPKGTQIAELEKFFASSK
		BtabCSP13		APPAGVDEKLLSKYDNFDVDRVLNNDRVLANYIKCLMDEGSCTNEGRDLKKSIPDVLAGGCDKCTEKQKSVTEKVIKHLINKRPKDWDRLSKKYDPQGQYKNKYADLYEKVQKEAAKESKEPSKPTKDTKETTKVTKDTKESAKAPKA
Nilaparvata lugens		NlugCSP1		MFKNVLLVCLLVAVVSAKPKPAEKKQYTTKYDNIDLDEILNNQRLFDNYYKCLLGGKCTPDGQELREALPDALATACSKCTEKQRVGTEKVIKYLIEKKPTEYSELEKKYDPQGNYKRKYQAEAAKRGIKV
		NlugCSP2		MSKLPVTLVLMLAVFSVDCGKLYKDRYTTKFDKIDLDEALNNQRLFESYLKCLMGDKCSPDGYELREALPDALATACAKCSEAQKAGTEKVIRFLIEKRPKEYALLEKKYDPEGIYRDKYKPIAEMKGIKLD
		NlugCSP3		MKFLCVTIFECALIVVAFGMPQDTTYPTTYDDVNVDDILHNDRLFNRYFTCLTKKEGCTPEGKLLAATIPDALATTCAKCSAKQKTAAEKVIKYLYFNKRDKFDELAKIYDPESNYLNKYLVDGFPAKV
		NlugCSP4		MFLIAVWALSPRRLPWGLPWGGLAGVAAQQQAKNTRYTTRFDSIDVEVILKNERIFRRYMDCLLDKGRCTPEARELKRLLPEALKTECLKCSEVQRRQGAKVMAFIIKNKRPSWELLLAKYDPQGIFRAKYMYNENNIEAVLKQLEREQQGIYGTYSSTNSTTSSNSTSIR
		NlugCSP5		MRCLLLVAVVCAALVAVCHAQDSKYTSKYDNIDIDKILKNDRVLSQYIKCLMGEGSCTQEGRELKRLLPDAIQSNCSKCSEKQRSASVKVMRHLRQSRERDWNRLLDKYDPQGDKRKNLKLD
		NlugCSP6		MLWAARFIVLPLLFCVLQVWSAPADEKYTDIDFDSILANRRVLSSYVKCLTDKGPCTPQGKELKKIVPEVIQTSCTKCSPQQKKVVRNVITTMQSKYKDQWDLVVNKYDPKKQRSGELKAFLSGTD
		NlugCSP7		MASASSGTTSTTSAPKTAESASAKSSSKDEIPDQTFDRYINNERYMLMQYECLMGNKPCDHVGRKLKAAVPLVVRGLGCPKCSQREEDQMKRIVSHVQRSYPDKWQKLIKKYGN
		NlugCSP8		MSSTMLVFVAVLCFSAVLAKPADKYTTKYDNIDLDEVLSNQRLFDSYFKCLMGGKCTPDGQELRDALPDALATACEKCSEKQKEGTEKVMKFLIEKKPTEFAELEKKYDPQGTYRQKYKAEADKRGYSV
		NlugCSP9		MKSQQLLVSCLFICTWLVVLMAPSANAAPKEKDPERKALYRLEYIDIEKVLDNNRMLTNFIRCFLRQGPCTPEARDFRKLLPKLAKTMCSDCTARQRYIIKKVFKHLMEERPKEWELLMDRFDPQRKYAERLDTFMVDMTTRAPVTSSPMPSSPVTLTSSSVTMSSTTQRVIEILRTSTDMSNESRPAS
		NlugCSP10		MFMLLACSELGSGQQQQNVDNIEMSIYDKMFENMDVNSLLKNHRLVDSYLKCFLNEGSCTHIGHEVKMMIPEVIKSRCGTCGENQMRALKAGLRLFIVLRPDDWQRFLDVYDPDRKEWPHIKAFMDSDD
Sogatella furcifera		SfurCSP1		MFNLLTLVVCLSTIAVQIQAAPEEAQYTTKYDKINLDEILNNDRLFKSYFGCLMGGKCTPDGQTLRDILPDALETACSKCSDTQKAGTEKVFKFMIEKKPSEFADLEKKYDPNGKYRARYEADAEKFGIKV
		SfurCSP2		MVLADTPTTSPKVETKAVESGKSSSKDEIPDQTFDRYINNERYMLMQYECLMGNKPCDHVGRKLKAAVPLVVRGLGCPKCSQREEDQMKRIVSHVQRSYPDKWQKLIKKYGN
		SfurCSP3		MQLLYALVFGCTLVMVSSDMPQSTYPTKYDDYNPDDILKNDRLFNQYFICLTKKKGCTTAGELLSAIIPDALATSCAKCSAKQKAIGEKVIRFLYFNKPDEFAEMSKIYDPEGKYLEMYIASGGLI
		SfurCSP4		MKCPLLSVSCLWISLLALSSSASAATKEKDPERKALYRLEYIDIEKVLDNNRMLTNFIRCFLRKGPCSPEARDFRKLLPKLAKTMCSDCSPRQRFIIKKVFKHLMEERPKEWELLMDRFDPQRKYAERLDTFMVDMTTPSTTTTTTSTTPSTPMSSTTQRIIEILRTSTEMSNESSP
		SfurCSP5		MSEILVTSLIFMLLAASELGLGQQQQTQKPQQQNVDNIEMSIYDKMFENMDVNSLLKNHRLVDSYLKCFLNEGSCTHIGHEVKMMIPEVIRSRCATCGENQMRALKAGLRLFIVRRPDDWKRFLDVYDPDRTEWPHIKAFMESDD
		SfurCSP6		MKLALFCCLLGLVAAVSAQSEKSEKPEKYTTKYDYINVDEILSNDRLFNSYYKCLMGGKCTPGGPELRTHLPDALQTNCSKCSEKQKEFSDKVIKHLMDNKPEEFSALVKKYDPEGIYKDAFKPKHNQ
		SfurCSP7		MRASKASSLVAVLLIAVWGFTGVQAQQKSKDTRYTTRFDSIDVEVILKNERIFKRYMDCLLDKGRCTPEARELKRLLPEALKTECLKCSEVQRRQGAKVMGFIIKNKRPYWDLLLAKYDPQGIFRAKYNYNENNIEGVLKQLEREQQGLYGTYSNTTNTTNTVNSTSTRK
		SfurCSP8		MLKFTLTLLVLAVVSVNCGKLYKDRYTTKFDKIDLDEALNNQRLFESYLKCLMGDKCSPDGYELREALPDALATACAKCSDAQKAGTEKVIRFLIEKRPKEYALLEKEYDPEGIYRDKYKPIAQEKGIKI
		SfurCSP9		MRCLLLVAVVFAAFIAAARADEANKYTSKYDNIDIDKILKNDRVLSQYIKCLMGEGSCTQEGRELKRLLPDAIQSNCSKCSEKQRQASVKVMRHLRQSKERDWNRLLDKYDPQGDKRKNLKLD
Laodelphax striatella		LstrCSP1		MASVSSATLTAAALLALLALQLTAAQNFNEADIARMLNDSGLVQRQISCILGEAACDNIGNMLKLAIPEVLKRNCRSCNAQQASNARRLISFVQANYPAQWQRIQSRYVG
		LstrCSP2		MRCLLLVAVICAAFIAAAQADEANKYTSKYDNIDIDKILKNDRVLSQYIKCLMGEGSCTQEGRELKRLLPDAIQSNCSKCSEKQRQASVKVMRHLRQSRVRDWNRLLDKYDPQGDKRKNLKLD
		LstrCSP3		MKLALFCCLLGLVIAVSAEKYTTKYDHINVEEILNNERLFNSYYKCLMGGKCTPDGLELRTHLPDALRTNCSKCSEKQKEFSDKVIRYLIDNKPEEFAALTKKYDPEGIYKTTFGPQFKKDNTTTNQ
		LstrCSP4		MLWAAKFIVFPLIFCVLQVWSAPADEKYSDIDFESILANRRVLSSYVKCLTDKGPCTPQGKELKKIVPEVIQTSCTKCSPQQKKVVRNVITTMQSKYKDQWDLVVNKYDPKKQRAGELKAFLAGTD
		LstrCSP5		MLKFKLTLLVMASAFFSVDGGKLYKDRYTTKFDKIDLDEALNNQRLFESYLKCLMGDKCSPDGYELREALPDALATACAKCSEAQKAGTEKVIRFLIEKRPKEYALLEKKYDPEGVYRDKYKPIAEEKGIKI
		LstrCSP6		MQASSLAMLLIAVWVLSPRRPLSGGFAGVHAQQSKNTRYTTRFDSIDVEVILKNERIFKRYMDCLLDKGRCTPEARELKRLLPEALKTECLKCSEVQRRQGAKVMAFIIKNKRPYWDLLLAKYDPQGVFRAKYKYNDQNIEAVLKQLEREQQGLYGTYSNPTNTTTVNSASSRK
		LstrCSP7		MIQRTQGFNSIVVLLLIKLTVLSMVLASTHAPAPTPTPKVETKATEAAKSSSKDEIPDQTFDRYINNERYMLQQYECLMGNKPCDHVGRKLKAAVPLVVRGLGCPKCSPREEEQMKRIVSHVQRSYPDKWQKLIRKYGQ
		LstrCSP8		MKSPCLLSVSCCILVLVASSASAAPKEKDPERKALYRLEYIDIEKVLDNNRMLTNFIRCFLRKGPCSPEARDFRKLLPKLAKTMCSDCSPRQRFIIKKVFKHLMEERPKEWELLMDRFDPQRKYAERLDTFMVDMTTRATPTTTTTTIPTTTTPMSSTTQRIIEILRTSTEMSNESRP
		LstrCSP9		MSEVLVMILIFMLLAGREQRLQQQQQQQQQPQPQQQNVDNIEMSIYDKMFENMDVNSLLKNHRLVDSYLKCFLNEGSCTHIGHEVKMMIPEVIRSKCATCGENQMRALKAGLRLFIALRPDDWKRFLDVYDPDRTEWPHIKAFMEYDD
		LstrCSP10		MYDHINVYNILKNERLFNRYFTCLTKKEGCTPEGKLLAAAILDALETSCANCSNEQRKLAEQVIQYLYFNKRDKFDELAMIYDLEGVFQEYHIAEYLVSGSWMPDFRKLPPV
		LstrCSP11		MKFLYFTVFGCALVMFTSAIPEIIFTSAMPQKTYSTMYDHINVNNILKNDRLFNRYFTCLTKRGGCTPEGKLLAAAILDALETSCANCSNEQRKLARQVIQYL
		LstrCSP12		MFKNLLVVCLLVAAVSAKPKPAEKKNTTKYDNIDLDEILNNQRLFDNYYKCLLGAKCTPDGQELKEALPDALATACSKCTEKQRVGTEKVIRHLIEKKPTEYAELEKKYDPQGTYKRKYQAEAIKRGIKV
Apolygus lucorum		AlucCSP1		MLKVLVLLAAVVCCVSAAATYTSKYDNIDLDEILSNTRLYKKYFDCLANKGKCTPDGKELKESLPDALKTNCAKCTKKQQEGTDKVLRHVLKNKPNDYKVLESIYDPTGIYRKKYEIEAEKRGIKLPGSH
		AlucCSP2		MASKLSVVLLIGAVGMVLAADKYTDKYDNIDLDEILGNQRLYQKYFDCIQGKGKCTPDGAELKETIPEALKTECAKCSDKQKAGVEKVLRHLIREKPDDYKVLEDQFDPEGVYRKKYEDLKKKVEEGKPIEY
		AlucCSP3		MKVAVLVLLCVGAALSAEVYTSKYDNIDVDKILSNDRILTQYIKCLMEEGNCTNEGKELKKTLPDALASGCTKCSEKQKAQTEKVLRHLSKNRPRDWNRLKNKYDPKGEYSKKYEKEAKAISA
		AlucCSP4		MKFVAALFVASVAVLAVEAADQYTTKYDNIDLDDILKNQRLYKKYFECLTNKGKCTPDGKELKEHLPDALKTGCSKCSEKQRAGSEKVIKHLLKNKPSDYAILEKIYDPQGSYKKKYEAEAKKLGINV
		AlucCSP5		MVGKLSVVLLIGAVGMVLAAELYTDKYDNIDVDEILGNQRLYQKYFDCIQGKGKCTPDGAELKKNIPEALQTDCAKCSEKQKAGVEKVLRHLINEKPEDYKVLEEQFDPEGVYRKKYEHLKKKVEEGKPV
		AlucCSP6		MVSKLSIVLLIGALADVWASELYTDKYDNIDVDEILGNQRLYQKYFDCIQGKGKCTPDGAELKKNIPEALQTDCAKCSEKQKAGVEKVLRHLINEKPEDYKVLEEQFDPEGVYRKKYEHLKKKVEEGKPIEY
		AlucCSP7		MVSKLSIVLLLGALADVWAAELYTDKYDNIDIDEILNNDRMYKNYFNCVMGNGKCTPDGLELKAKIPEALQTECAKCSDKQKKGAEKVLRFIINQKKDDYKLLEEKFDPEGVYRKKYEAQKKLAEEGKPIEY
		AlucCSP8		MLKVLVLLANAASTYTTKYDNIDLDEILSNQRLYKKYYDCLANKGKCTPDGKELKEALPDALKTNCSKCSKKQQEGTDKVLRYVLKNKPNDYKVLENIYDPSGNYRKRYEDEASKRGIKLPGSH
Adelphocoris lineolatus		AlinCSP1		MLKVLVLLAAVVCCVSAAATYTSKYDNIDLDEILSNTRLYKKYFDCLANKGKCTPDGKELKESLPDALKTNCAKCTKKQQEGTDKVFRHVLKNKPNDYKVLESIYDPPGIYRKKYEAEAEKRGIKLPGSH
		AlinCSP2		MKVAVLVLLCVGAALSAEVYTSKYDNIDVDKILSNDRILTRYIKCLMEEGNCTNEGKELKKTLPDALASGCTKCSEKQKAQTEKVLRHLSKNRPRDWALLKTKYDPKGEYSKKYEKEAKALTA
		AlinCSP3		MISKLSMVLLIGAFADVWAAEQYTDKYDNIDIDEILNNDRMYKNYFHCVMGNGKCTPDGLELKAKIPEALQTECAKCTDKQKKEVEKVLRFIINQKKDDYKLLEEKFDPEGVYRKKYEAQKKLVEEGKPIEY
		AlinCSP4		MRIILSAFLVAMACSLATCEMTEEEFYTKVFEEVDPDFILDNERILTSYLKCFYNEIECNAHAEVVKKSIPDVLATVCGRCSDKQKSIFKYSLNKFIPAHPKDWEKILSIYDPSGEAWPKVKAFIES
		AlinCSP5		MGHLTIVLLAAAFEVLTGSRAYTTHYDYIDVDQVLNNTRLYTKYVECLLGQGKCTPEARELRDKLPEALQTNCARCSERQASESHRVIRFLIQNRQEDFKLLEAKYDPSGLYFKRFEEETKRNVSLS
		AlinCSP6		MFYKLSVVVLMGILAGVWAADKYTDKYDNIDIDEILTNERLYKKYFDCIQGTGKCTPDGIELKEKIPEALKTECAKCNEKQKAGVEKVMRYLITKKPEDFKILEDKFDPEGVYRKKYEAQRKLVEEGKPVEY
		AlinCSP7		MNYKLSVILLIGVLASVWAASTYTDKYDNIDLDEILTNERLYKKYFDCIQGKGKCTPDGTELKEAIPDALKTECAKCNAKQKAGVEKVLRHLLTKKAEDYKILEDKFDPEGVYRKKYEAQKKLADEGKPIVL
		AlinCSP8		MDYKLSVMLLMGVLACAWAADKYTDKYDNIDIDEILNNERLYKKYFDCILGNGKCTPDGTELKETIPDALKTACAKCNDKQKAGVEKVLRHLLTKKAEDYKILEAKFDPEGVYRKKYEAQKKLAEEGKPIAL
Aphis gossypii		AgosCSP1		MNILTIFCYVTVMCDTQVKPAVSAQRLQSVNQNVTPTNDGRKTIRETSSYPTRYDYIDIEAVMNNERIIKILFNCVMSRGPCTREGLELKRIVPDAIQTECAKCNERQRKQAGKVLAHLLQYKPEYWKMLVQKFDPNNVYLRKYMADNDDDEKLSLQKLSNDTTKKKRNI
		AgosCSP2		MAHLNLFVVLIASLIYFTSAAEEKYTTKFDNFDVDKVLNNNRILTSYIKCLLDEGNCTNEGRELKRVLPDALKTDCSKCTDVQKDRSEKVIKFLIKNRSTDFDRLTAKYDPTGEYKKNLEKFEKERASAKPLKA
		AgosCSP4		MDSRIAVVCVVLAAFAVDQTVGAPQKDAVAASGPAYTTKYDHIDVDQVLASKRLVNSYVQCLLDKKPCTPEGAELRKILPDALKTQCAKCNATQKNAALKVVDRLQKDYDAEWKQLLDKWDPKREHFQKFQQFLAEEKKKGFTKF
		AgosCSP5		MHCKVLIALCCVAVYAVQASPAGTATAAAVSADDEIKDFPAYMKRFDKLNVEQVLNNDRVLASHLKCFLNEGPCVQQSRDLKRVIPVIANNGCNGCTERQMTTIKKSLNFLRTKKPTEWARLVKIYDPSGTKLNKFLDA
		AgosCSP6		MIKLILAIAFCVSITMTVVQTAPAKYTTKYDNVNIDEILNNDRLVASYFKCLMETGKCTPEGEEIKRWLPEAIENKCEDCSEKQKLGSEKIIKFLFEKKNDMWKQLEAKYDPQGTYRQRYAEEAKKLNINV
		AgosCSP7		MSRSSSSVTMKVFVIAICVCAALARPEDVKVENKPAVIKSETLAAPLPTNIVKRATDTIQLDSSLPNVSEDVLDKALSDRRFVQRQLKCATGEGPCDPIGRKIKAHAPLVLRGMCVKCSQSEIKQIQRVMSHIQKNYPKEYTKMLKQYQSGF
		AgosCSP8		MNNIIMNNSRGRYGIFSLLAVTIAAIMLVHQPATVRCADGGIITPQQQQQQTMMFTAPTGYYVSTYDHIDVGRLLRNNKVVSGYVKCFVNEGPCTPDGKLVKAYLLPEIIRTVCGKCTPRQKDMARMVLKHIYTYRQADFEKIMQIYDTDGKRNEILAFMNH
		AgosCSP10		MINTRPRKLVRCIRGVSISVAKGDDAVNAENKDDDSHLVNREEIQRYMSMMEKINIDQMLNNTRLMSNNVKCFLNEGPCTAHLREMKKMVPMLVKDSCSSCTKEQKIMMKKAMDAVKARRPNDYEKLSKFFDPEGKYEKKFLENLNESK
