# Supplementary material for: Identification and Expression Analysis of Odorant-Binding and Chemosensory Protein Genes in Virus Vector Nephotettix cincticeps
Source: Insects. 2022 Nov 5;13(11):1024. doi: 10.3390/insects13111024 (PMC9698027; doi:10.3390/insects13111024)
Supplement: Supplementary file 1 [file insects-13-01024-s001.zip › Table S3 Primers used for qRT-PCR analysis of OBP and CSP genes of N. cincticeps.xlsx]

## Sheet: Sheet1
Table S3 Primers used for qRT-PCR analysis of OBP and CSP genes of N. cincticeps.
Genes		Forward primers (5’-3’)		Reverse primer (5’-3’)
Odoarant binding proteins (OBPs)
OBP1		AAGTGGGGCGGGTGAGTTC		GCTGTGTCGTTGTTCCAATATGC
OBP2		GCGGCTGGTATCGGAGTCG		TTCTGTTGTGGTTCTGCGGATTC
OBP3		GCGAGGCAGCGATGAAGC		TCTCTGATGGCGACAATCTTAGC
OBP4		AGCCATGAGTGTTACTTACCTGAC		CCTTGAATCTGGATGTTGGAATGC
OBP5		TGATGAAGAACGGCAAGATGGAC		AGCAACAGCAACCTCACATTCG
OBP6		CGTCCTCCTGATGCTCCTCTC		GGAAGTCGTGGAAGTCGTATGC
OBP7		TCGTCTTCTGCGTCGTCCTC		GTTGTACTTGCCCTCACTGTCG
OBP8		AACCGACAACAAGGAACTGACC		CACATTGATGATGGACAACTGAGG
OBP9		AATGTATCCTGAGAATGGGCAACG		GGACCGCTCGCCTTATAGTGG
OBP12		AGCAACCTACTGACGCCTGAAG		GCACTCTGATGTCGGGTCTATCC
OBP13		CAATCTGGAGCCTGCTATGCC		CACTGAACACCCTGTAGACTGC
OBP14		GTCAAAGTATTCCCACAACACAAC		CCTCACTCGTCATCACTCCAG
Chemosensory proteins (CSPs)
CSP1		CGCTAACGACCGCATCCTCAC		TCTCCCAGTCCCTCGCCTTG
CSP2		GATGTTGGTGATTGTTGTGTTGGC		GTCGCTCGTTCTTGAGGATTTGG
CSP3		AGCGACTGGTCAGCAACTACG		TCCGAGCACTTGGCACACTTAG
CSP4		TCTGTTGTGCGTGGTCTGTG		ACTTGGTCGTGTACTTGTCCTG
CSP5		TGCTCCTCTCTGTCGTCGTG		GCACCTTCTTGGCACCTTCC
CSP6		ACCAACTATGTCAAGTGCTTCGTC		GTCGTTGTTCCTCTGCGTGTAG
CSP7		GCGATTGTCGTATTGGCAGTGG		CAGGTGGCAGCGTAGGTATCAG
CSP8		CTTGGGTTGCCTGCGTATTTG		CTGCTGAGAAGTTCGTCTATGTTG
CSP9		AGTCCTGCCCGAAGTCCTTG		CTTGGCGTGCGTCTTCTTGG
CSP11		GCCGCCCGTACTGAGGTG		GTGTCGTTGGATGTGACTGAGC
Reference gene
β-actin		GTGTTGGATTCTGGTGATG		GGTAGTCTGTAAGGTCTCG
