# Supplementary material for: Identification and Expression Analysis of Odorant-Binding and Chemosensory Protein Genes in Virus Vector Nephotettix cincticeps
Source: Insects. 2022 Nov 5;13(11):1024. doi: 10.3390/insects13111024 (PMC9698027; doi:10.3390/insects13111024)
Supplement: Supplementary file 1 [file insects-13-01024-s001.zip › Table S4 Overall profile analysis of sequencing data.xlsx]

## Sheet: Sheet1
Table S4 Overall profile analysis of sequencing data
	Ncin_H			Ncin_B
	Ncin_H1	Ncin_H2	Ncin_H3	Ncin_B1	Ncin_B2	Ncin_B3
Raw Reads (bp)	55619484	544,37,680	55002578	57,288,418	56067996	55490832
Raw Bases (G)	8.34	8.17	8.25	8.59	8.41	8.32
Valid Reads (bp)	55049478	53867286	54310996	56650118	55478556	54656850
Valid Bases (G)	7.73	7.56	7.62	7.95	7.79	7.67
Valid (%)	98.98	98.95	98.74	98.89	98.98	98.5
Q20 (%)	98.88	98.9	98.9	98.89	98.88	98.9
Q30 (%)	95.81	95.86	95.85	95.83	95.82	95.92
GC (%)	46.89	46.7	46.85	47.44	47.96	49.31
