# Supplementary material for: Identification and Expression Analysis of Odorant-Binding and Chemosensory Protein Genes in Virus Vector Nephotettix cincticeps
Source: Insects. 2022 Nov 5;13(11):1024. doi: 10.3390/insects13111024 (PMC9698027; doi:10.3390/insects13111024)
Supplement: Supplementary file 1 [file insects-13-01024-s001.zip › Table S5 The summary of distribution of assembled length in N. cincticeps transcriptome.xlsx]

## Sheet: Sheet1
Table S5 The summary of distribution of assembled length in N. cincticeps transcriptome
		Transcripts	Unigenes
Min Length		201	201
Median Length		510	456
Max Length		16461	16461
GC (%)		41.18	40.17
N50		1619	1504
All		75441	46623
Total Assembled Bases		70164995	39916996
