# Supplementary material for: Identification and Expression Analysis of Odorant-Binding and Chemosensory Protein Genes in Virus Vector Nephotettix cincticeps
Source: Insects. 2022 Nov 5;13(11):1024. doi: 10.3390/insects13111024 (PMC9698027; doi:10.3390/insects13111024)
Supplement: Supplementary file 1 [file insects-13-01024-s001.zip › Table S6 The number of unigenes annotated in different database.xlsx]

## Sheet: Sheet1
Table S6 The number of unigenes annotated in different database
		Number	Ratio (%)
All		46623	100
GO		13891	29.79
KEGG		12142	26.04
Pfam		13543	29.05
Swissprot		12443	26.69
eggNOG		16406	35.19
NR		16495	35.38
